1  
2  
3  
4  
5  
6  
7  
8  
9  
10  
11  
12  
13  
14  
15  
16  
17  
18  
19  
20  
21  
22  
23  
24  
25  
26  
27  
28  
29  
30  
31  
32  
33  
34  
35  
36  
37  
38  
39

**Loss of tau and Fyn reduces compensatory effects of MAP2 for tau and reveals a Fyn-independent effect of tau on glutamate-induced Ca<sup>2+</sup> response**

Guanghao Liu<sup>1</sup>, Ramasamy Thangavel<sup>^2</sup>, Jacob Rysted<sup>1</sup>, Yohan Kim<sup>\*2</sup>, Meghan B Francis<sup>2</sup>, Eric Adams<sup>2</sup>,  
Zhihong Lin<sup>3</sup>, Rebecca J Taugher<sup>4</sup>, John A Wemmie<sup>4</sup>, Yuriy M Usachev<sup>3</sup>, Gloria Lee<sup>2</sup>

<sup>1</sup>Interdisciplinary Program in Neuroscience, <sup>2</sup>Department of Internal Medicine, <sup>3</sup>Department of Pharmacology, <sup>4</sup>Department of Psychiatry, University of Iowa Carver College of Medicine, Iowa City, IA 52242, USA

Current Addresses:

<sup>^</sup>University of Missouri-Columbia, Columbia, MO 65211

<sup>\*</sup>Nathan S. Kline Institute for Psychiatric Research, Orangeburg, NY 10962

|                    |                                |
|--------------------|--------------------------------|
| Guanghao Liu       | guanghao-liu@uiowa.edu         |
| Ramasamy Thangavel | thangavelr@health.missouri.edu |
| Jacob Rysted       | jacob-rysted@uiowa.edu         |
| Yohan Kim          | Yohan.Kim@nki.rfmh.org         |
| Meghan B. Francis  | meghan.b.francis@dmu.edu       |
| Eric Adams         | eric-adams@uiowa.edu           |
| Zhihong Lin        | zhihong-lin@uiowa.edu          |
| Rebecca J. Taugher | rebecca-taugher@uiowa.edu      |
| John A. Wemmie     | john-wemmie@uiowa.edu          |
| Yuriy M. Usachev   | yuriy-usachev@uiowa.edu        |
| Gloria Lee         | gloria-lee@uiowa.edu           |

Key words: tau, Fyn, MAP2, calcium, proximity ligation assay

Running title: tau<sup>-/-</sup>/Fyn<sup>-/-</sup> affects Ca<sup>2+</sup> and MAP2

Corresponding author: Gloria Lee

[gloria-lee@uiowa.edu](mailto:gloria-lee@uiowa.edu)

500 Newton Road, ML B191

University of Iowa Carver College of Medicine

Iowa City, IA 52242

40  
41  
42  
43  
44  
45  
46  
47  
48  
49  
50  
51  
52  
53  
54  
55  
56  
57  
58  
59  
60  
61  
62  
63  
64

## Summary Statement

The downstream effect of the interaction between microtubule-associated protein tau and Src family non-receptor tyrosine kinase Fyn was investigated with a tau/Fyn double KO mouse. We demonstrate that tau has a Fyn-independent role in glutamate-induced calcium response and that MAP2 can compensate for tau in interacting with Fyn in dendrites.

## Abstract

Microtubule-associated protein tau associates with Src family tyrosine kinase Fyn. A tau-Fyn double knockout (DKO) mouse was generated to investigate the role of the complex. DKO mice resembled Fyn KO in cognitive tasks and resembled tau KO mice in motor tasks and protection from pentylenetetrazole-induced seizures. In  $Ca^{2+}$  response, Fyn KO was decreased relative to WT and DKO had a greater reduction relative to Fyn KO, suggesting that tau may have a Fyn-independent role. Since tau KO resembled WT in its  $Ca^{2+}$  response, we investigated whether MAP2 served to compensate for tau, since its level was increased in tau KO but decreased in DKO mice. We found that like tau, MAP2 increased Fyn activity. Moreover, tau KO neurons had increased density of dendritic MAP2-Fyn complexes relative to WT neurons. Therefore, we hypothesize that in the tau KO, the absence of tau would be compensated by MAP2, especially in the dendrites, where tau-Fyn complexes are of critical importance. In the DKO, decreased levels of MAP2 made compensation more difficult, thus revealing the effect of tau in the  $Ca^{2+}$  response.

65

66

## Introduction

67

68

69

70

71

72

73

74

75

Tau was initially discovered as a microtubule-associated protein enriched in axons (Binder et al., 1986; Weingarten et al., 1975). Interest in tau dramatically increased after hyperphosphorylated tau was found in neurofibrillary tangles (NFT), a major hallmark of Alzheimer's disease (AD) (Grundke-Iqbal et al., 1986; Kosik et al., 1986; Nukina and Ihara, 1986; Wood et al., 1986), and after mutations in the tau gene were found to cause frontotemporal dementia with Parkinsonism linked to chromosome 17 (Clark et al., 1998; Hutton et al., 1998; Poorkaj et al., 1998; Spillantini et al., 1998). Subsequent studies have revealed new functions for tau, such as the regulation of motor-driven axonal transport (Dixit et al., 2008; Trinczek et al., 1999), formation and trafficking of stress granules (Vanderweyde et al., 2016), and postsynaptic scaffolding (Ittner et al., 2010).

76

77

78

79

80

81

82

83

84

85

86

87

88

89

90

91

However, despite the multiple roles played by tau, initial studies of five lines of independently generated tau KO mice did not suggest any gross deficits or loss of viability (Dawson et al., 2001; Fujio et al., 2007; Harada et al., 1994; Tan et al., 2018; Tucker et al., 2001). Further testing of tau KO mice has yielded controversial results, as some studies reported minor memory deficits (Ahmed et al., 2014; Ikegami et al., 2000; Lei et al., 2014; Ma et al., 2014) while a larger number of studies reported no cognitive deficits (Dawson et al., 2010; Dawson et al., 2001; Ittner et al., 2010; Kimura et al., 2014; Lei et al., 2012; Li et al., 2014; Morris et al., 2013; Regan et al., 2015; Roberson et al., 2007; Tan et al., 2018; van Hummel et al., 2016). Morphological studies of tau KO mice reported alterations in small caliber axons as the only abnormality (Harada et al., 1994) while low density neuronal cultures from another line of tau KO mouse indicated slowed axonal development, although brain development appeared normal (Dawson et al., 2001). The lack of more pronounced behavioral and morphological phenotypes has largely been attributed to functional compensation by other microtubule-binding proteins such as microtubule associated protein 1A/1B (MAP1A/1B) and MAP2 (Harada et al., 1994; Ma et al., 2014). While it is thought that compensating for a loss of microtubule stabilizing activity is important, given the additional functions for tau, other compensatory mechanisms may be needed if these functions are critical for mouse viability and depend on tau.

92

93

94

95

96

97

Following our finding that tau could associate with the cytoplasmic face of the plasma membrane (Brandt et al., 1995), we found that the proline-rich domain of tau interacts with the SH3 domain of Src family non-receptor tyrosine kinases (SFK) such as Fyn and Src (Lee et al., 1998) and that Fyn phosphorylated tau on Tyr18 (Lee et al., 2004). In addition, we showed that tau increased the auto-phosphorylation of Fyn as well as the enzymatic activity of Fyn (Sharma et al., 2007). Also, tau was critical for nerve growth factor (NGF)-induced mitogen activated protein kinase (MAPK) activation, suggesting a

98 role for tau in signal transduction (Leugers et al., 2013; Leugers and Lee, 2010). Interest in the tau-Fyn  
99 interaction has been increased by the presence of phospho-tyr18-tau in NFTs(Bhaskar et al., 2010; Lee et  
100 al., 2004), reported alterations of Fyn expression in AD brain(Ho et al., 2005; Shirazi and Wood, 1993), and  
101 the neuroprotective effects of Fyn depletion in AD models(Chin et al., 2004; Lambert et al., 1998).  
102 Furthermore, Fyn is highly expressed in the central nervous system(Umemori et al., 1992) and  
103 phosphorylates the N-methyl-D-aspartate receptor (NR) subunit 2B (NR2B) at Y1472 residue(Nakazawa et  
104 al., 2001; Rong et al., 2001), which facilitates the interaction between the NR and the postsynaptic density  
105 95 protein (PSD-95)(Tezuka et al., 1999) and regulates long-term potentiation (LTP) and memory  
106 formation(Kojima et al., 1997; Stein et al., 1992). Tau has been implicated in targeting Fyn to the  
107 postsynaptic space, as tau KO mice showed decreased levels of Fyn and pY1472 NR2B in synaptosome  
108 preparations(Ittner et al., 2010). As a result, the PSD-NR interaction was disrupted, leading to protection  
109 from both pentylenetetrazole (PTZ) induced seizures and amyloid- $\beta$  induced excitotoxicity (Ittner et al.,  
110 2010; Roberson et al., 2007). However, electrophysiological studies of tau KO resembled WT (Ittner et al.,  
111 2010; Kimura et al., 2014; Roberson et al., 2011), further underlying the need to elucidate the function of  
112 the tau-Fyn interaction and its significance in neuronal cell function.

113 To further understand the impact of the combined action of tau and Fyn, we generated a tau-Fyn  
114 double knockout ( $\tau^{-}/Fyn^{-}$ ) mouse, characterized its behavioral, biochemical, and neurophysiological  
115 properties, and found a role for tau in the neuron's calcium response in a Fyn-independent manner.  
116 Additionally, we identified the location of tau-Fyn complexes in neurons and determined that in dendrites,  
117 the loss of such complexes led to compensation mediated by MAP2.

118

119

## Results

### 120 Generation of tau-Fyn DKO mice

121 In order to investigate the downstream effects of the tau-Fyn interaction, we generated  $\tau^{-}/Fyn^{-}$   
122 double knockout mice (DKO) by breeding tau KO (C57BL/6) mice(Dawson et al., 2001) with Fyn KO  
123 (C57BL/6-S129) mice(Stein et al., 1992) (Fig. S1). Polymerase chain reaction (Fig. 1A) was used for  
124 genotyping and western blotting (Fig. 1B) was used to confirm the loss of tau and Fyn.

125 During breeding, DKO animals exhibited a propensity to develop non-obstructive hydrocephalus  
126 postpartum, consistent with the observation that having the homozygous Fyn KO trait on a C57BL/6  
127 background increased the occurrence of hydrocephalus (Goto et al., 2008). While mice with severe  
128 hydrocephalus could be identified within 6 weeks of age by their domed heads and hunched backs, less  
129 severe levels of hydrocephalus escaped visual detection. Therefore, to identify mice with moderate  
130 hydrocephalus, MRI was used to image the lateral ventricle. Quantification of the images allowed us to

131 classify mice as being normal or having moderate or severe hydrocephalus (Fig. 1C). Behavioral tests  
132 showed that both Fyn KO and DKO mice with mild and severe hydrocephalus had increased total  
133 movements in the open field test (Fig. 1D) and decreased total freezing in contextual fear conditioning (Fig.  
134 1E) when compared to normal mice of the same genotype. This suggested that hydrocephalus caused the  
135 animal to be hyperactive. Thus, subsequent behavioral and biochemical tests were performed using only  
136 non-hydrocephalic mice with normal brain structure that had been screened by MRI. Beginning at eight  
137 weeks of age, the mice underwent a series of motor and behavioral tests.

138

### 139 **DKO mice recapitulate specific behaviors of Fyn KO and tau KO mice**

140 Using the open field apparatus, mice of the four genotypes had similar total movements and percent  
141 movement in the center (Fig. S2A, B). This indicated an absence of motor deficits or anxiety phenotype at  
142 young age. However, when mice were aged to 12 months and underwent the pole test, tau KO and DKO  
143 mice required more time to descend the pole relative to WT and Fyn KO mice (Fig. S2C).

144 In novel object recognition, mice from the four genotypes displayed equal preferences for two  
145 identical objects on training day (Fig. 2A, left). However, on testing day, both Fyn KO and DKO mice  
146 performed significantly worse than WT and tau KO mice in interacting with the new object (Fig. 2A, right).  
147 There were no differences between WT and tau KO mice ( $p=0.9012$ ), and between Fyn KO and DKO mice  
148 ( $p=0.1301$ ). The absence of anxiety as monitored by the open field test suggested that Fyn KO and DKO  
149 had a cognitive deficit.

150 In contextual fear conditioning, Fyn KO and DKO mice spent significantly less time freezing as  
151 compared to WT and tau KO mice on training day (Fig. 2B, left). On testing day, Fyn KO and DKO mice  
152 also spent less time freezing than WT and tau KO mice as measured using either minute by minute  
153 measurements (Fig. 2B right panel) or total time freezing (Fig. 2C). There was no statistically significant  
154 difference between Fyn KO and DKO mice ( $p=0.8442$ ) and between WT and tau KO mice ( $p=0.7076$ ) (Fig.  
155 2C). To assess learning versus memory, the amount of freezing during the first minute of the testing day  
156 was divided by the amount of freezing during the last minute of the training day. There was no significant  
157 difference between the ratios of the four genotypes (Fig. 2D), indicating that the mice did not differ with  
158 respect to memory and that the deficits exhibited by Fyn KO and DKO mice on day 2 were due to a  
159 learning deficit.

160 Previous reports have also shown that tau ablation protected against pentylentetrazole (PTZ)  
161 induced seizures (Roberson et al., 2007). This property has been attributed to tau depletion reducing levels  
162 of Fyn at the post-synaptic region leading to disrupted NR stability within the post-synaptic density (Ittner et  
163 al., 2010). In terms of both latency to develop seizures and maximum seizure stages reached, DKO and tau  
164 KO mice were equally and dramatically protected against PTZ whereas Fyn KO mice were only moderately

165 protected relative to WT mice (Fig. 2E, F). There was no significant difference between tau KO and DKO  
166 mice ( $p=0.9752$ ; Fig. 2F). To summarize, in motor tasks and PTZ induced seizures, DKO mice resembled  
167 tau KO mice while in cognitive and memory tasks, DKO mice resembled Fyn KO mice.

168

### 169 **Localization of Tau- SFK complexes in WT primary hippocampal culture**

170 To further investigate the functions of the tau/Fyn complex, proximity ligation assays (PLA) were  
171 used to localize tau-Fyn complexes in WT primary hippocampal cultures (Fig. 3A). PLAs are able to detect  
172 endogenous protein-protein interactions *in situ*; signals are recovered when the two PLA probes lie within  
173 40 nm of each other, using rolling circle amplification to yield a marker for the interaction (Gullberg et al.,  
174 2004) (Soderberg et al., 2006). As a control, tau KO cultures were similarly probed (Fig. S3B). Tau-Fyn  
175 complexes were found in all cellular compartments of WT hippocampal neurons (axons (Fig. 3B), dendrites  
176 (Fig. 3C), and cell bodies (Fig. 3D)). For quantitation, PLA dots were counted in both dendrites and axons.  
177 Dot intensity was not used because the intensity of a PLA signal reflected the rolling circle step, making the  
178 intensity level an artificial characteristic. Upon quantitation, the density of tau-Fyn complexes in dendrites  
179 (number of PLA puncta/process length) was 2.54 fold higher than that in axons (Fig. 3E). As expected,  
180 there were no tau-Fyn complexes in tau KO neurons (Fig. S3A). Since we have previously shown that tau  
181 increased Fyn auto-phosphorylation (Sharma et al., 2007), complexes between tau and activated SFK  
182 (pSFK) were also examined (Fig. 3F-J). Similar to the tau-Fyn complexes, the density of tau-pSFK  
183 complexes in dendrites was 2.04 fold higher than that in axons (Fig. 3J). However, since the pSFK antibody  
184 cannot distinguish between activated Fyn and activated Src, tau-Src complexes were also examined as a  
185 control. The density of tau-Src complexes in dendrites was increased by 2.78 fold relative to that in the  
186 axon (Fig. 3O).

187 Since tau is known to be enriched in axons, we found it surprising that the density of tau-SFK  
188 complexes was higher in the dendrites relative to axons. However, we noted that axons were significantly  
189 longer and more numerous than dendrites and that the density of PLA puncta was relatively high in the  
190 proximal axon but dramatically decreased in the distal axon whereas the density of PLA puncta in the  
191 shorter dendrites was uniformly high. In fact, if only the proximal axon was used to calculate density, the  
192 density of tau-Fyn complexes in axons would match that of the dendrites (Fig. S3). Therefore, when the  
193 total axon length was used, the calculated density in axons was lower than that in dendrites.

194

### 195 **Fyn KO and DKO hippocampal insoluble PSD fractions have decreased phospho-Y1472 NR2B and** 196 **phospho-SFK levels**

197 Because the density of tau-Fyn complexes in dendrites exceeded that in axons and because tau has  
198 been shown to target Fyn to the post-synaptic density to affect NR2B phosphorylation (Ittner et al., 2010),

199 we wanted to determine if NR2B phosphorylation was altered in the DKO mice. Crude hippocampal  
200 synaptosomes were fractionated into “soluble non-PSD” and “insoluble PSD” fractions using Triton X-100  
201 (Fig. 4A) (Ittner et al., 2010; Lopes et al., 2016b; Milnerwood et al., 2010). The presence of synaptophysin  
202 in the “soluble non-PSD” and the presence of PSD-95 in the “insoluble PSD” fractions (Fig. 4B)  
203 demonstrated the separation of PSD and non-PSD membranes from crude WT synaptosomes; tau and Fyn  
204 were present in both fractions (Fig. 4B). In examining the “insoluble PSD” fraction from 9-12 month old  
205 hippocampus, PSD-95 and total NR2B levels were not significantly different between the four genotypes  
206 (One-way ANOVA  $p=0.6462$ ,  $p=0.3439$ , respectively; Fig. 4C, D). However, relative to WT, pY1472-  
207 NR2B levels were decreased by 54.6 % in Fyn KO and 64.0 % in DKO insoluble PSD fractions, with Fyn  
208 KO and DKO not being significantly different from each other ( $p=0.8871$ ; Fig. 4C, D). WT and tau KO  
209 were also not significantly different from each other ( $p=0.8284$ ; Fig. 4C, D). We then examined whether  
210 Src might be compensating for Fyn. In the PSD fraction, although the Src level was unchanged in the four  
211 genotypes ( $p=0.7699$ ; Fig. 4C, D), the activated SFK (pSFK) level in Fyn KO and DKO was decreased by  
212 73.2% and 84.0% with respect to that of WT. There was no significant difference between tau KO and WT  
213 ( $p=0.9946$ ) and between Fyn KO and DKO ( $p=0.8512$ ; Fig. 4C, D). While the pSFK antibody cannot  
214 distinguish between activated Fyn and activated Src, all four genotypes had similar Src levels in the PSD  
215 but only Fyn KO and DKO had decreased pSFK levels. Since the absence of Fyn did not alter Src levels but  
216 reduced pSFK levels, we concluded that most of the activated tyrosine kinase in WT and tau KO PSD  
217 fractions was Fyn that was responsible for phosphorylating Y1472-NR2B.

### 218 219 **Decreased glutamate-induced $Ca^{2+}$ response in Fyn KO and DKO primary hippocampal neurons**

220 Since phosphorylation of NR2B has been shown to be involved in facilitating  $Ca^{2+}$  response upon  
221 NR activation (Nakazawa et al., 2001; Rong et al., 2001; Tezuka et al., 1999), we were interested in  
222 determining the glutamate-induced  $Ca^{2+}$  influx of DKO neurons. In addition, depleting tau with shRNA in  
223 WT neurons had already been shown to affect glutamate-induced, NMDA receptor-dependent  $Ca^{2+}$  influx  
224 (Miyamoto et al., 2017), so we were also interested in the response of tau KO neurons. Sample tracings of  
225  $[Ca^{2+}]_i$  from five individual cells of each genotype are shown in Fig. 5A. At baseline, unstimulated  
226 intracellular  $[Ca^{2+}]_i$  from the four genotypes were similar ( $p=0.2808$ ; Fig. 5B). Upon stimulation, Fyn KO  
227 neurons had a 29.9% reduction and DKO neurons had a 53.1% reduction relative to WT neurons; tau KO  
228 neurons were not significantly different from WT neurons ( $p=0.7264$ ). However,  $Ca^{2+}$  response in DKO  
229 neurons was significantly different from Fyn KO neurons (Fig. 5C).

230 The fact that DKO neurons had an even greater reduction relative to Fyn KO neurons suggests that  
231 tau had a Fyn-independent role in regulating  $Ca^{2+}$  response that was unmasked in the absence of Fyn. In  
232 addition, the absence of any changes in the  $Ca^{2+}$  response of tau KO neurons suggested that another protein



233 could compensate for tau in the tau KO. However, this compensatory effect was apparently lost in the  
234 DKO, leading to an exacerbated decrease in Ca<sup>2+</sup> influx.

235

236 **Microtubule-associated protein 2 (MAP2) was altered in KOs and like tau, could increase Fyn**  
237 **activity**

238 Our finding that tau KO had no memory deficits, no changes in pY1472-NR2B, and no changes in  
239 glutamate-induced Ca<sup>2+</sup> response suggested that either Fyn did not require tau to mediate these functions or  
240 that a different protein was compensating for the loss of tau with respect to its Fyn interaction. Interestingly,  
241 another microtubule-associated protein, MAP2, has been found to be upregulated in tau KO mice (Ma et al.,  
242 2014) and in agreement with the previous data, we also found MAP2 to be increased by 48.9% in the tau  
243 KO mice (p=0.021, Fig. 6A). However, while it has been shown that MAP2 compensated for the loss of tau  
244 by maintaining microtubule stability, as measured by tubulin acetylation (Ma et al., 2014), the possibility of  
245 other compensating mechanisms remained unexplored.

246 Similar to tau, MAP2 has a PXXP domain that interacts with the SH3 domain of Fyn (Zamora-  
247 Leon et al., 2001). While we have shown that for tau, this interaction potentiated Fyn and Src activities  
248 (Sharma et al., 2007), the ability of MAP2 to exhibit a similar property has not been demonstrated. To  
249 investigate, MAP2c, the shortest isoform in the MAP2 family was tested for its ability to increase auto-  
250 phosphorylation of Fyn and to increase the enzymatic activity of Fyn. To examine auto-phosphorylation of  
251 Fyn, as detected by antibodies against activated SFK, 3T3 cells were transfected with Fyn alone or with  
252 MAP2c (Fig. 6B). After Fyn was immunoprecipitated (IPed) and probed for activated SFK, we found that  
253 the phosphorylation of Fyn expressed with MAP2c was increased by 61.9% relative to Fyn expressed alone  
254 (Fig. 6C). This indicated that the presence of MAP2c increased the auto-phosphorylation of Fyn. To ensure  
255 that the anti-Fyn antibody was specific for Fyn and not other SFKs, the IPed Fyn was also probed for Src.  
256 Src was not detected (Fig. 6C), indicating that the IP was indeed specific for Fyn. To investigate the ability  
257 of MAP2c to increase the enzymatic activity of Fyn, *in vitro* kinase assays were conducted using tubulin, a  
258 known substrate for Fyn (Marie-Cardine et al., 1995). Because MAP2c can bind tubulin, an N-terminal  
259 fragment of MAP2c (N-MAP2c) containing the Fyn binding motif but lacking the microtubule binding  
260 domain was used. Fyn and N-MAP2c were separately expressed in 3T3 cells and IP'ed for use in the kinase  
261 reaction. Tubulin was incubated either alone, with Fyn, or with pre-incubated Fyn and N-MAP2c. The  
262 presence of N-MAP2c increased tyrosine phosphorylation of tubulin by 59.4% relative to tubulin incubated  
263 with Fyn alone (p=0.049; Fig. 6D). Our data provide evidence that similar to tau, MAP2 can increase Fyn  
264 activity. As an additional indication that MAP2 resembled tau with regards to potentiating SFK activity, we  
265 examined the ability of MAP2c to sustain SFK activation in stimulated 3T3 cells. In this system, SFK  
266 activation was indirectly assessed and we had previously shown that tau was able to prolong SFK activation



267 following stimulation. When MAP2 was compared to tau in this assay, we found that MAP2 resembled tau,  
268 prolonging SFK activation in cells (Fig. S5).

269 Interestingly, when MAP2 levels were assessed in Fyn KO and DKO mice, MAP2 was decreased  
270 by 23.6% and 33.2 %, respectively, relative to WT mice ( $p=0.044$  and  $p=0.0045$ ; Fig. 6A), with was no  
271 significant difference between the two ( $p=0.438$ ; Fig. 6A). The labeling of MAP2 in 12-month-old  
272 hippocampal sections from the four genotypes confirmed the biochemical result (Fig. S4). Compared to  
273 WT, hippocampal sections of Fyn KO and DKO mice appeared to display shorter MAP2 fibers and weaker  
274 MAP2 intensity while tau KO mice appeared to show stronger MAP2 intensity (Fig. S4). Therefore, in  
275 regulating MAP2 expression levels, Fyn appeared to act downstream of tau, since the DKO resembled the  
276 Fyn KO. In the DKO, the decrease in MAP2 most likely eliminated the ability of MAP2 to compensate for  
277 the loss of tau. Thus, when DKO neurons experienced a further decrease in calcium influx, relative to the  
278 Fyn KO, we were able to identify a Fyn-independent effect that tau had on glutamate-induced calcium  
279 influx. In the tau KO, it was likely that this effect was not detected because of the increased MAP2 level.

280

### 281 **Tau KO neurons had more dendritic MAP2-Fyn complexes than WT neurons**

282 To determine whether MAP2-Fyn complexes might compensate for the loss of tau-Fyn complexes  
283 in the tau KO, MAP2-Fyn and MAP2-pSFK complexes were visualized in WT and tau KO primary  
284 hippocampal cultures using PLA (Fig. 7). Relative to WT dendrites, tau KO dendrites had a 32.5% increase  
285 in MAP2-Fyn density (Fig. 7A, B, G) and a 39.9% increase in MAP2-pSFK density (Fig. 7C, D, H). As  
286 expected, we did not find any MAP2-containing complexes in axons, identified as MAP2 negative and  
287 tubulin positive processes (Fig. 7, open arrowheads). In tau KO neurons, MAP2-Src complex density was  
288 increased 36.8% relative to WT neurons (Fig. 7 E, F, I). Together, these data support the notion that MAP2  
289 compensates for tau in terms of interacting with SFKs in dendrites.

290

## 291 **Discussion**

292 In the present study, we generated tau<sup>-/-</sup>/Fyn<sup>-/-</sup> DKO mice to investigate the combined effect of tau  
293 and Fyn and found that they resembled tau KO mice in motor tasks and protection from PTZ while  
294 resembling Fyn KO mice in cognitive tasks. DKO and Fyn KO mice also had decreased Y1472-NR2B  
295 phosphorylation levels in hippocampal insoluble PSD fractions. These changes were accompanied by a  
296 reduction in glutamate-induced Ca<sup>2+</sup> response in Fyn KO and DKO primary hippocampal neurons, with  
297 DKO neurons having a more severe reduction than Fyn KO neurons, indicating that tau may have a Fyn-  
298 independent effect on regulating Ca<sup>2+</sup> influx. Together with our findings that MAP2 potentiated Fyn activity  
299 and that dendritic MAP2-Fyn complexes were increased in tau KO neurons relative to WT neurons, our

300 data suggest that MAP2 may compensate for the loss of tau by increasing the levels of MAP2-Fyn and  
301 MAP2-pSFK complexes in dendrites.

302 In motor tasks, our aged tau KO and DKO mice had deficits in the pole test, which was consistent  
303 with results obtained by other laboratories (Ikegami et al., 2000; Lei et al., 2014; Lopes et al., 2016a; Morris  
304 et al., 2013). Since aged Fyn KO mice did not exhibit such deficits, we concluded that tau, not Fyn, was  
305 involved in the motor pathway. Another known property for tau KO mice is their protection from PTZ-  
306 induced seizures and A $\beta$  induced excitotoxicity (Roberson et al., 2007), traits attributed to reduced Fyn  
307 levels at the post-synaptic region and disrupted NR stability within the post-synaptic density (Ittner et al.,  
308 2010). However, in PTZ-induced seizures, our finding that tau KO mice had greater protection than Fyn  
309 KO mice suggested that tau may participate in Fyn independent pathways to regulate seizure susceptibility.  
310 If tau acted only with Fyn, Fyn KO mice would have shown protection against PTZ equal to that of the tau  
311 KO. The fact that in response to PTZ, DKO and tau KO mice had similar seizure thresholds argued that  
312 Fyn's protective effect against seizure was encompassed by tau's protective effect and did not represent a  
313 separate pathway since the DKO mice did not exhibit an additional level of protection relative to tau KO  
314 mice. Besides interacting with Fyn and affecting NR2B-PSD95 association, tau has been reported to affect  
315 two other pathways that regulate seizure susceptibility. One pathway involves SynGAP1, a site-specific  
316 inhibitor of Ras, where it has been found that reducing SynGAP1 in tau KO mice increased susceptibility to  
317 PTZ-induced seizure (Bi et al., 2017). A second pathway has been reported where the loss of tau prevented  
318 the depletion of Kv4.2, a dendritic potassium channel, and mitigated hyperexcitability in an AD mouse  
319 model (Hall et al., 2015). These data indicate that tau is involved in other mechanisms that modulate seizure  
320 susceptibility and excitotoxicity in dendrites. We speculate that one or both of these mechanisms will be  
321 Fyn-independent.

322 Our data also provide evidence that Fyn plays a role in regulating PTZ seizure severity, as our non-  
323 hydrocephalic Fyn KO mice had decreased PTZ-induced seizure susceptibility. Our results disagreed with  
324 previous reports that Fyn KO mice had either increased seizure susceptibility (Miyakawa et al., 1996) or  
325 similar susceptibility (Kojima et al., 1998) relative to WT mice. However, these previous studies likely  
326 included mice with undetected mild/moderate hydrocephalus. By using MRI to identify Fyn KO mice with  
327 mild/moderate hydrocephalus, we had found that mice with hydrocephalus had increased seizure  
328 susceptibility compared to WT (Fig. S6). In addition, when a cohort of superficially normal Fyn KO mice,  
329 with and without hydrocephalus, was analyzed as a group, the seizure threshold resembled that of WT (Fig.  
330 S6). Therefore, because prior studies were not aware that the Fyn KO mice might have had mild/moderate  
331 hydrocephalus (Kojima et al., 1998; Miyakawa et al., 1996), their data did not reflect the sole contribution  
332 of the Fyn KO trait. Our data suggest that the Fyn KO trait conferred mild protection against seizures.

333 In agreement with prior studies where mice lacking Fyn, but not other members of Src family non-  
334 receptor tyrosine kinases, had deficits in LTP and performance in the Morris water maze (Grant et al.,  
335 1992), we found Fyn, not tau, to be critically involved in cognitive tasks (Dawson et al., 2010; Dawson et  
336 al., 2001; Ittner et al., 2010; Kimura et al., 2014; Lei et al., 2012; Li et al., 2014; Morris et al., 2013;  
337 Roberson et al., 2007; van Hummel et al., 2016). In contextual fear conditioning, both Fyn KO and DKO  
338 mice already showed deficits on training day, where the mice differed from WT at the 5<sup>th</sup> (DKO) or 6<sup>th</sup> (Fyn  
339 KO) minute (Fig. 2B). Thus, it is possible that Fyn depletion could have changed the way animals perceived  
340 pain, leading to a decrease in the saliency of the shock and weakening the association between shock and  
341 the chamber, with learning and memory being normal. Another possibility is that the expression of freezing  
342 behavior itself was impaired. Future studies using cue induced freezing or predator odor induced freezing  
343 would determine whether Fyn and/or tau depletion affected freezing behavior. In Fyn KO and DKO mice,  
344 the cognitive deficits were accompanied by decreases in Y1472-NR2B phosphorylation levels in the  
345 hippocampal insoluble PSD fractions while WT and tau KO mice had no memory deficits and no decreases  
346 in pY1472-NR2B. The similarity in the levels of pY1472-NR2B in our WT and tau KO mice agree with  
347 other findings using the same tau KO line used here (Lopes et al., 2016b). However, another report using a  
348 different tau KO line found reduced levels of pY1472-NR2B (Ittner et al., 2010). The fact that different  
349 lines of tau KO mice exhibited different phenotypes underlines the complexity of the analysis of tau KO  
350 mice (Ke et al., 2012; Lei et al., 2014).

351 In the brain, tyrosine phosphorylation of NR2B is important in regulating receptor trafficking,  
352 gating kinetics, and Ca<sup>2+</sup> permeability (reviewed by (Groverman et al., 2012; Kalia et al., 2004; Trepanier et  
353 al., 2012)). Since Fyn KO and DKO mice had reduced levels of pY1472-NR2B, we examined calcium  
354 influx using hippocampal neurons of each genotype. As expected, Fyn KO neurons had reduced glutamate-  
355 induced Ca<sup>2+</sup> response relative to WT neurons. Interestingly, DKO neurons had an even greater reduction  
356 relative to Fyn KO neurons while tau KO neurons had a response similar to WT neurons, suggesting that  
357 tau had a Fyn-independent role in regulating Ca<sup>2+</sup> response that was unmasked in the absence of Fyn.  
358 Possible mechanisms include interactions of tau with other Ca<sup>2+</sup> permeable channels such as voltage gated  
359 Ca<sup>2+</sup> channels, regulators of NMDARs, or other components of the PSD, with tau modulating signaling  
360 pathways that increase intracellular Ca<sup>2+</sup> levels. Additional studies are needed to explore these nonexclusive  
361 possibilities. Our Ca<sup>2+</sup> response data from the tau KO neurons agree with a report showing that brain slices  
362 from tau KO mice had no change in glutamate-induced Ca<sup>2+</sup> response profiles (Bi et al., 2017) and is  
363 consistent with the overall picture of the tau KO having no changes in excitatory post-synaptic currents  
364 (EPSCs), AMPA/NMDA current ratios, and LTP (Ittner et al., 2010; Kimura et al., 2014; Roberson et al.,  
365 2011). However, when tau was acutely depleted by shRNA in WT neurons, a decrease in Ca<sup>2+</sup> response  
366 after glutamate stimulation was revealed (Miyamoto et al., 2017). This suggested that extended tau

367 depletion, achieved through genetic ablation in a tau KO mouse, may be fundamentally different from acute  
368 tau depletion achieved through the use of tau shRNA. Indeed, although no permanent deficits in axonal  
369 development were reported in neurons from tau KO mice (Dawson et al., 2001; Harada et al., 1994), WT  
370 neurons treated with tau antisense oligonucleotides or shRNA exhibited dramatic deficits in axon formation  
371 defective migration properties, abnormalities in mitochondria transport, and developmental deficits  
372 (Caceres and Kosik, 1990); (Sapir et al., 2012). These findings indicate that comparing neurons from a  
373 knockout animal to those created by treating WT neurons with shRNA may be less straightforward than  
374 expected. Successful creation of a KO animal may be required to select genetic alterations that allow pups  
375 to be born and animals to be bred. Moreover, the extent of compensation in the tau KO mouse has been  
376 analyzed by microarray analysis and it was found that in the brain, several signal transduction genes such as  
377 fosB and c-fos were up-regulated 5-24 fold (Oyama et al., 2004). Based on these findings, we demonstrated  
378 that tau was required for NGF-induced AP-1 activation (Leugers and Lee, 2010). The fact that the loss of  
379 tau required up-regulation of both fosB and c-fos for compensation suggested that AP-1 activation was a  
380 critical tau function required by a mouse to survive.

381 Our finding that tau KO had no memory deficits, no changes in pY1472-NR2B, and no changes in  
382 glutamate induced  $Ca^{2+}$  response suggested that either Fyn did not require tau to mediate these functions or  
383 that another protein was compensating for the loss of tau with respect to its Fyn interaction. Interestingly,  
384 other microtubule-associated proteins (MAPs), MAP1A/1B and MAP2, are upregulated in tau KO mice  
385 (Harada et al., 1994; Ma et al., 2014) and in agreement with previous data reported for our tau KO mouse  
386 line (Ma et al., 2014), we found MAP2 to be increased in our tau KO mice (Fig. 6A). In contrast, MAP2  
387 was significantly decreased in Fyn KO mice, correlating with the reduction and shortening of MAP2  
388 positive dendrites described previously (Kojima et al., 1997). In DKO mice, MAP2 was decreased,  
389 indicating that the Fyn effect superseded the tau effect on MAP2 levels. The mechanisms by which Fyn  
390 depletion down-regulated or tau depletion up-regulated MAP2 are not known. However, since Fyn has been  
391 shown to affect protein translation (White et al., 2008) and tau, fos activation (Leugers and Lee, 2010), the  
392 effects of Fyn may be downstream of those of tau. Therefore, in the DKO, the Fyn KO trait resulted in the  
393 loss of MAP2-mediated compensation for the loss of tau whereas in the tau KO, up-regulated MAP2 levels  
394 would be capable of compensating for the loss of tau. In examining the glutamate induced  $Ca^{2+}$  response,  
395 the response in tau KO resembled those in WT due to compensation by MAP2. In contrast, with the  
396 reduction of MAP2 in both the Fyn KO and DKO and the attenuation of  $Ca^{2+}$  influx in the DKO relative to  
397 the Fyn KO, we were able to uncover a role for tau in the  $Ca^{2+}$  response that was independent of Fyn (Fig.  
398 5C).

399 In the tau KO mice, if the tau-Fyn interaction was of critical importance, one would predict that  
400 compensation for the loss of the tau-Fyn interaction would occur. Our finding that tau KO neurons had a

401 significantly higher density of MAP2-Fyn complexes in the dendrites relative to WT neurons suggested that  
402 MAP2 would have an increased role in interacting with Fyn in the absence of dendritic tau. We also showed  
403 that similar to tau, MAP2 also potentiated Fyn activity (Fig. 6B, C), leading us to hypothesize that MAP2  
404 would have an increased role in interacting with Fyn, affecting NR2B phosphorylation and NR function in  
405 the absence of dendritic tau. Future studies using gain-of-function and loss-of-function experiments would  
406 further test this hypothesis.

407 In summary, we generated a tau<sup>-/-</sup>/Fyn<sup>-/-</sup> DKO mouse and found that tau was capable of regulating  
408 Ca<sup>2+</sup> influx in a Fyn-independent manner, a property that we propose to be mimicked by MAP2 in the  
409 absence of tau. As dysregulation of Ca<sup>2+</sup> influx is a known mechanism leading to excitotoxicity in AD, our  
410 findings identify tau as a new therapeutic target in the regulation of neuronal Ca<sup>2+</sup>. Most importantly,  
411 increased levels of dendritic MAP2-Fyn complexes in the tau KO highlight the importance of the tau-Fyn  
412 interaction and indicate the need to compensate if tau is lost. Our findings suggest that the association and  
413 activation of Fyn by tau in dendrites are critical neuronal functions.

414

415

## Methods and Materials

### 416 Mice

417 Tau KO (C57BL/6) mice (Dawson et al., 2001) and Fyn KO (C57BL/6/S129) mice (Stein et al.,  
418 1992) were obtained from Jackson Laboratories and crossed to generate heterozygotes. The heterozygotes  
419 were then bred to generate tau<sup>-/-</sup>/Fyn<sup>-/-</sup> and tau<sup>+/+</sup>/Fyn<sup>+/+</sup> mice (Fig. S1). Mice were genotyped as described  
420 by Jackson Laboratories. All procedures were approved by the University of Iowa Institutional Animal Care  
421 and Use Committee and in strict accordance with the NIH Guide for the Care and Use of Laboratory Mice.

422 When the homozygous Fyn KO trait was bred into a C57BL/6 background, the mice exhibited a  
423 50% chance of developing non-obstructive hydrocephalus postpartum (Goto et al., 2008). The DKO mice  
424 also developed hydrocephalus. Magnetic resonance imaging (MRI) was used to differentiate normal from  
425 hydrocephalic mice. Only normal mice screened by MRI were used for behavioral and biochemical tests.

426

### 427 Magnetic resonance imaging

428 Varian Unity/Inova 4.7 T small-bore MRI system (Varian, Inc., Palo Alto, CA; Small Animal  
429 Imaging Facility, University of Iowa) with an in-plane resolution of 0.13 x 0.25 mm<sup>2</sup> and 0.6 mm slice  
430 thickness was used. Coronal images were collected and lateral ventricle volume sizes were analyzed with  
431 ImageJ (Carter et al., 2012). A lateral ventricle volume ≤0.2 units was normal, ≥0.2 and ≤ 2 units was  
432 moderate, and ≥ 2 units was severe hydrocephalic.

433

434 **Open field test**

435 The open field test was done at 8 weeks as described(Coryell et al., 2007) with a dimension of 40.6  
436  $\times$  40.6  $\times$  36.8 cm open-field chamber (San Diego Instruments, San Diego, CA), 55 lux, for 20 min. Total  
437 activity was measured by total beam breaks and central activity was measured by beam breaks in center  
438 (15.2  $\times$  15.2 cm). 14 WT (14 male), 20 Tau KO (9 male, 11 female), 18 Fyn KO (15 male, 3 female), 13  
439 (10 male, 3 female) DKO mice were tested. Since there were no statistically significant differences between  
440 males and females, their results were combined.

441

442 **Pole test**

443 The pole test was done at 12 months of age as described(Lei et al., 2014). Trials were excluded if  
444 the mouse jumped or slid down the pole. Between tests, the pole was cleaned using 70% ethanol. 9 WT, 13  
445 tau KO, 11 Fyn KO, 18 DKO male mice were tested.

446

447 **Novel object recognition**

448 The novel object recognition test was done at 10 weeks as described(Tang et al., 2001). The time  
449 each animal spent exploring objects (defined as nose within an inch of the object) was manually  
450 determined. Discrimination index [DI =  $(X_1 - X_2) / (X_1 + X_2)$ ] was calculated. 17 WT (12 male, 5 female), 17  
451 tau KO (12 male, 5 female), 28 Fyn KO (16 male, 12 female), 18 DKO (14 male, 4 female) mice were used.  
452 Since there were no statistically significant differences between males and females, their results were  
453 combined.

454

455 **Contextual fear conditioning**

456 Contextual fear conditioning was done at 11 weeks as described(Sowers et al., 2013), using a near-  
457 infrared video-equipped fear conditioning chamber (Med Associates, Inc., St. Albans, VT). Freezing was  
458 scored with VideoFreeze software (Med Associates, Inc.). 32 WT (27 male, 5 female), 29 tau KO (21 male,  
459 8 female), 21 Fyn KO (14 male, 7 female), 20 DKO (14 male, 6 female) mice were tested. Since there were  
460 no statistically significant differences between males and females, their results were combined.

461

462 **Pentylentetrazole-induced seizures**

463 Pentylentetrazole (PTZ)-induced seizure was done at 12 weeks as described(Roberson et al.,  
464 2007). A modified Racine seizure scale was used: 0: normal behavior; 1: immobility; 2: tail extension; 3:  
465 forelimb clonus; 4: generalized clonic activity; 5: bouncing; 6: tonic extension; 7: death(Loscher et al.,  
466 1991; Racine, 1972). 25 WT (14 male, 11 female), 21 tau KO (9 male, 12 female), 36 (25 male, 11 female)



467 Fyn KO, and 26 DKO (19 male, 7 female) mice were used. Since there were no statistically significant  
468 differences between males and females, their results were combined.

469

#### 470 **Tissue preparation and subcellular fractionation**

471 PSD preps were isolated from hippocampi of 9-12 months old mice (Ittner et al., 2010; Lopes et al.,  
472 2016b; Milnerwood et al., 2010). As described, crude synaptosomal membranes were resuspended with 1%  
473 Triton X-100 containing buffer and after centrifugation, the supernatant containing non-PSD membranes  
474 was retained as the “soluble non-PSD” fraction. The pellet was resuspended in 1% Triton X-100, 1%  
475 deoxycholic acid, 1% SDS containing buffer and after centrifugation, the supernatant was retained as the  
476 triton “insoluble PSD” fraction.

477

#### 478 **Primary hippocampal neuron culture**

479 Primary hippocampal neuronal culture was performed as described (Beaudoin et al., 2012).  
480 Hippocampi from P0 pups were isolated and digested in 1 mg/ml trypsin (Sigma-T7409) and sequentially  
481 triturated with Pasteur pipettes. Cells were plated with MEM media (Gibco) containing 10% horse serum  
482 and 1  $\mu$ M insulin (Sigma-I5500) and maintained with Neurobasal-A Plus and 2% B27 Plus (Gibco) at 37 °C  
483 and 5% CO<sub>2</sub> until harvest. 50% of media was changed every 3 days.

484

#### 485 **In situ proximity ligation assay (PLA) and immunofluorescence**

486 PLA components were purchased from Sigma (Duolink® *in situ*) and the assay was performed per  
487 manufacturer’s instructions. Cells were imaged using confocal microscopy (Leica SP8 STED) and exported  
488 to ImageJ for analysis.

489 Primary antibodies used were: DA9 (1:50, mAb, generous gift of Dr. Peter Davies), Fyn3 (sc-16,  
490 1:250, Santa Cruz), MAP2 (1:1000, chicken polyclonal, Thermo Fisher, Cat # PA1-10005), MAP2 (HM-2,  
491 1:250, Sigma M4403), Src (36D10, 1:250, rabbit polyclonal, Cell Signaling, Cat #2109), phospho-Src  
492 (1:250, rabbit polyclonal, Tyr418; Thermo Fisher, Cat #44660G), and tubulin (1:50, YL1/2; Accu-Spec).  
493 Secondary antibodies used were anti-mouse Alexa 488 (1:250, Molecular Probes), anti-chicken Alexa 633  
494 (1:1000, Thermo Fisher), and anti-rat Alexa 647 (1:250 Jackson Immunoresearch).

495 To quantify the density of PLA puncta, ten random areas on each coverslip were photographed.  
496 Axons were identified by either tau or tubulin positive staining and MAP2 negative staining; dendrites were  
497 identified by MAP2 positive staining. The lengths of all visible processes were measured using ImageJ and  
498 all visible PLA puncta were manually counted. For each of the 10 areas, the densities of dendritic or axonal  
499 PLA puncta were calculated by dividing the number of PLA puncta located on dendrites or axons by the  
500 total dendrite or axon length, respectively. The experiment was performed 3 times. In Fig. 3, the density of

501 PLA in dendrites was expressed relative to the density in axons, where the average value was set as “1”. In  
502 Fig. 7, the density of PLA in tau KO mice was expressed relative to the density in WT mice, where the  
503 average value was set as “1”. In Fig. S3, for each neuron, the proximal axon length was defined as the  
504 average length of the dendrites from that neuron.

505

### 506 **Ca<sup>2+</sup> imaging**

507 Ca<sup>2+</sup> imaging was performed on primary hippocampal neurons (DIV 11-12) as described (Kim et al.,  
508 2009). Hippocampal neurons were loaded with 2 μM Fura-2/AM (Invitrogen) and then mounted on an  
509 inverted microscope (Olympus IX-71). The cells were perfused with HEPES buffered Hank's salt solution  
510 (HH buffer) to establish baseline and then stimulated with 100 μM Glutamate, 10 μM Glycine, and 0.2 μM  
511 Tetrodotoxin (TTX) in HH buffer. [Ca<sup>2+</sup>]<sub>i</sub> changes were continuously recorded by alternately exciting  
512 fluorescence at 340 nm (12-nm bandpass) and 380 nm (12-nm bandpass) using a Polychrome V  
513 monochromator (TILL Photonics, Munich, Germany). Fluorescence was recorded at 530 nm (50-nm  
514 bandpass) using an IMAGO charge-coupled device camera (640 × 480 pixels; TILL Photonics). A 20x  
515 objective (numerical aperture = 0.75, Olympus, Japan) and a 2×2 binning set at room temperature was used.  
516 [Ca<sup>2+</sup>]<sub>i</sub> was derived using the formula  $[Ca^{2+}]_i = K_d \beta (R - R_{min}) / (R_{max} - R)$ , with  $K_d = 275$  nM (Shuttleworth and  
517 Thompson, 1991),  $R = F_{340nm} / F_{380nm}$ ,  $R_{min} = 0.21$ ,  $R_{max} = 3.45$ , and  $\beta = 6.97$ . Data were analyzed using  
518 TILLvisION version 4.0.12 software (TILL Photonics).

519

### 520 **Immunoprecipitation**

521 3T3 (NIH) cells were grown in α-MEM supplemented with 10% fetal bovine serum (Hyclone) and  
522 transfected with either Fyn alone or with Fyn and MAP2c together. Cells were harvested with RIPA lysis  
523 buffer. Fyn was IPed with 1 μg Fyn antibody (mouse monoclonal antibody [mAb], sc-434, SantaCruz) and  
524 10 μL Protein G plus-agarose (CalBiochem). Washed Protein G bead pellets were resuspended in 2X  
525 Laemmli buffer and subjected to Western blot analysis. 3T3 cells have not been reported as  
526 contaminated or misidentified (International Cell Line Authentication Committee, October 14,  
527 2018).

528

### 529 **Plasmids**

530 pRc/CMV expressing the N-terminal fragment of human MAP-2c was synthesized by site-directed  
531 mutagenesis using the pRc/CMV MAP2c plasmid (Albala et al., 1993) as template. Residue 320 on MAP-  
532 2c was mutated to a stop codon. The construct was sequenced to verify the MAP2c sequence and the  
533 mutation site.

534

### 535 ***In vitro* phosphorylation of tubulin**

536 *In vitro* phosphorylation of tubulin was performed as described (Sharma et al., 2007). Fyn or  
537 truncated MAP2c (human N-MAP2c residue 1-319) were expressed in 3T3 cells and IPed using 1µg anti-  
538 Fyn (mAb, sc-434, SantaCruz) or 4 µg anti-MAP2 (HM-2, mAb, Sigma, Cat # M4403) and Protein G beads  
539 (CalBiochem). The beads containing Fyn were resuspended in 100 µL buffer (0.1% Triton, 50mM Tris  
540 pH7.5, 150 mM NaCl, 1 mM EDTA, 1mM AEBSF) and equally divided into two tubes. N-MAP2c beads  
541 were added to one of these tubes and nutated at 4°C for 1 hour, centrifuged, and supernatant discarded.  
542 Control tube was similarly treated, where Protein G beads were added to beads containing Fyn. 10 µg taxol-  
543 stabilized tubulin and kinase reaction buffer was added to both tubes and incubated for 5 min at 37°C. A  
544 third tube containing only tubulin, kinase reaction buffer, and 1µg mouse non-specific IgG was used as  
545 control. Samples were subjected to western blot analysis.

546

### 547 **Western blot analysis**

548 Western blotting was performed as described(Lee et al., 1998). Primary antibodies used were:  
549 Tau5-HRP (1:10,000, (Leugers and Lee, 2010)); Fyn3 (sc-16, 1:1000, rabbit polyclonal, Santa Cruz);  
550 GAPDH (1:25,000, mAb, Chemicon, Cat # MAB374); synaptophysin (SP15, 1:1000, mAb, Millipore, Cat  
551 # MAB329-C); PSD-95 (EP2652Y, 1:1000, rabbit monoclonal, Millipore, Cat# 04-1066); NR2B (1:1000,  
552 mAb, One World Labs, StressMarq, Cat # SMC-33D); phospho-Y1472-NR2B (1:1000, rabbit polyclonal,  
553 PhosphoSolutions, Cat # p1516-1472); Src (GD-11, 1:1000, mAb, Milipore, Cat # 05-184); phospho-SFK  
554 (1:1000, phospho-Src Tyr 418, rabbit polyclonal, Cell Signaling, Cat # 2101); MAP2 (HM-2, mAb, 1:1000,  
555 Sigma, Cat # M4403); generic phospho-tyrosine (4G10, 1:1000, mAb, Millipore, Cat # 05-321); and tubulin  
556 (1:1000, YL1/2; Accu-Spec). Quantification was done by densitometry using ImageJ. Protein levels from  
557 the PSD fraction were normalized to β-actin (Fig. 4) and protein levels from crude lysates were normalized  
558 to GAPDH (Fig. 6A), with values subsequently normalized to WT levels, which were represented as “1”. In  
559 Fig. 6C, pSFK was normalized to total Fyn and values from Fyn+MAP2c were normalized to Fyn alone  
560 condition with the latter represented as “1”. In Fig. 6D, 4G10 was normalized to both tubulin and Fyn and  
561 the Fyn+N-MAP2c condition was normalized to the Fyn alone condition with the latter represented as “1”.

562

### 563 **Statistical Analysis**

564 Statistical analysis was carried out with either Microsoft Excel or GraphPad Prism 7.0 using  
565 ordinary one way ANOVA with Tukey’s post hoc multiple comparison or unpaired parametric t-test when  
566 appropriate. For Fig. 2B and 2E, 2-way ANOVA with Tukey’s post hoc multiple comparison was used.

567  $p \leq 0.05$  was considered as statistically significant, with  $p \leq 0.05$  denoted as \*,  $p \leq 0.01$  denoted as \*\*,  $p \leq 0.001$   
568 denoted as \*\*\*, and  $p < 0.0001$  denoted as \*\*\*\*.

569

570

## 571 **Declarations**

572

### 573 **Animals**

574 Animal care was in compliance with National Institutes of Health guidelines for the care and use of  
575 laboratory animals and all animal procedures were approved by the University of Iowa Institutional  
576 Animal Care and Use Committee.

### 577 **Availability of data and material**

578 The datasets analysed in the current study are available from the corresponding author on  
579 reasonable request.

### 580 **Competing interests**

581 No competing interests declared.

### 582 **Funding**

583 G Lee received support from NIH/NIA R01 AG017753 and Alzheimer's Association IIRG-12-  
584 241042. G Liu is supported by NIH/NIA F30 AG054134 and by Iowa Neuroscience Institute  
585 Kwak-Ferguson Fellowship. YMU is supported by NIH/NINDS R01 NS096246.

### 586 **Authors' contributions**

587 G Liu designed the experiments, performed the PCR, behavioral, biochemical, calcium imaging,  
588 and PLA experiments, analyzed data, and wrote the manuscript. R Thangavel and E Adams  
589 performed IHC and analysis, MB Francis generated the double knockout mice, Y Kim assisted with  
590 PLA experiments, J Rysted and Z Lin assisted with calcium imaging, RJ Taugher assisted with  
591 behavioral work, and JA Wemmie and YM Usachev provided valuable discussions and data  
592 analysis. G Lee designed experiments, analyzed data, and revised the manuscript.

### 593 **Acknowledgements**

594 We thank Drs. Peter Davies for generously providing the DA9 antibody, Stefan Strack for valuable  
595 suggestions, Bridget Shafit-Zagardo for MAP2c plasmid, Dan Thedens for help with MRI, Skye  
596 Souter for technical assistance, and Craig Morita for help with figures. We acknowledge the  
597 University of Iowa Medical Scientist Training Program for support to Guanghao Liu and the  
598 Holden Comprehensive Cancer Center (NIH/NCI P30CA086862) for support at the University of  
599 Iowa Central Microscopy Research Facility and Small Animal Imaging Facility.

600

## References

- 601 **Ahmed, T., Van der Jeugd, A., Blum, D., Galas, M. C., D'Hooge, R., Buee, L. and Balschun,**  
602 **D.** (2014). Cognition and hippocampal synaptic plasticity in mice with a homozygous tau deletion.  
603 *Neurobiol Aging* **35**, 2474-8.
- 604 **Albala, J. S., Kalcheva, N. and Shafit-Zagardo, B.** (1993). Characterization of the transcripts  
605 encoding two isoforms of human microtubule-associated protein-2 (MAP-2). *Gene* **136**, 377-8.
- 606 **Beaudoin, G. M., 3rd, Lee, S. H., Singh, D., Yuan, Y., Ng, Y. G., Reichardt, L. F. and**  
607 **Arikkath, J.** (2012). Culturing pyramidal neurons from the early postnatal mouse hippocampus and cortex.  
608 *Nat Protoc* **7**, 1741-54.
- 609 **Bhaskar, K., Hobbs, G. A., Yen, S. H. and Lee, G.** (2010). Tyrosine phosphorylation of tau  
610 accompanies disease progression in transgenic mouse models of tauopathy. *Neuropathol Appl Neurobiol*  
611 **36**, 462-77.
- 612 **Bi, M., Gladbach, A., van Eersel, J., Ittner, A., Przybyla, M., van Hummel, A., Chua, S. W.,**  
613 **van der Hoven, J., Lee, W. S., Muller, J. et al.** (2017). Tau exacerbates excitotoxic brain damage in an  
614 animal model of stroke. *Nat Commun* **8**, 473.
- 615 **Binder, L. I., Frankfurter, A. and Rebhun, L. I.** (1986). Differential localization of MAP-2 and  
616 tau in mammalian neurons in situ. *Ann N Y Acad Sci* **466**, 145-66.
- 617 **Brandt, R., Leger, J. and Lee, G.** (1995). Interaction of tau with the neural plasma membrane  
618 mediated by tau's amino-terminal projection domain. *J Cell Biol* **131**, 1327-40.
- 619 **Caceres, A. and Kosik, K. S.** (1990). Inhibition of neurite polarity by tau antisense  
620 oligonucleotides in primary cerebellar neurons. *Nature* **343**, 461-3.
- 621 **Carter, C. S., Vogel, T. W., Zhang, Q., Seo, S., Swiderski, R. E., Moninger, T. O., Cassell, M.**  
622 **D., Thedens, D. R., Keppler-Noreuil, K. M., Nopoulos, P. et al.** (2012). Abnormal development of  
623 NG2+PDGFR-alpha+ neural progenitor cells leads to neonatal hydrocephalus in a ciliopathy mouse model.  
624 *Nat Med* **18**, 1797-804.
- 625 **Chin, J., Palop, J. J., Yu, G. Q., Kojima, N., Masliah, E. and Mucke, L.** (2004). Fyn kinase  
626 modulates synaptotoxicity, but not aberrant sprouting, in human amyloid precursor protein transgenic mice.  
627 *J Neurosci* **24**, 4692-7.
- 628 **Clark, L. N., Poorkaj, P., Wszolek, Z., Geschwind, D. H., Nasreddine, Z. S., Miller, B., Li, D.,**  
629 **Payami, H., Awert, F., Markopoulou, K. et al.** (1998). Pathogenic implications of mutations in the tau  
630 gene in pallido-ponto-nigral degeneration and related neurodegenerative disorders linked to chromosome  
631 17. *Proc Natl Acad Sci U S A* **95**, 13103-7.
- 632 **Coryell, M. W., Ziemann, A. E., Westmoreland, P. J., Haenfler, J. M., Kurjakovic, Z., Zha, X.**  
633 **M., Price, M., Schnizler, M. K. and Wemmie, J. A.** (2007). Targeting ASIC1a reduces innate fear and  
634 alters neuronal activity in the fear circuit. *Biol Psychiatry* **62**, 1140-8.
- 635 **Dawson, H. N., Cantillana, V., Jansen, M., Wang, H., Vitek, M. P., Wilcock, D. M., Lynch, J.**  
636 **R. and Laskowitz, D. T.** (2010). Loss of tau elicits axonal degeneration in a mouse model of Alzheimer's  
637 disease. *Neuroscience* **169**, 516-31.
- 638 **Dawson, H. N., Ferreira, A., Eyster, M. V., Ghoshal, N., Binder, L. I. and Vitek, M. P.** (2001).  
639 Inhibition of neuronal maturation in primary hippocampal neurons from tau deficient mice. *J Cell Sci* **114**,  
640 1179-87.
- 641 **Dixit, R., Ross, J. L., Goldman, Y. E. and Holzbaur, E. L.** (2008). Differential regulation of  
642 dynein and kinesin motor proteins by tau. *Science* **319**, 1086-9.
- 643 **Fujio, K., Sato, M., Uemura, T., Sato, T., Sato-Harada, R. and Harada, A.** (2007). 14-3-3  
644 proteins and protein phosphatases are not reduced in tau-deficient mice. *Neuroreport* **18**, 1049-52.
- 645 **Goto, J., Tezuka, T., Nakazawa, T., Sagara, H. and Yamamoto, T.** (2008). Loss of Fyn tyrosine  
646 kinase on the C57BL/6 genetic background causes hydrocephalus with defects in oligodendrocyte  
647 development. *Mol Cell Neurosci* **38**, 203-12.



- 648 **Grant, S. G., O'Dell, T. J., Karl, K. A., Stein, P. L., Soriano, P. and Kandel, E. R.** (1992).  
649 Impaired long-term potentiation, spatial learning, and hippocampal development in fyn mutant mice.  
650 *Science* **258**, 1903-10.
- 651 **Groveman, B. R., Feng, S., Fang, X. Q., Pflueger, M., Lin, S. X., Bienkiewicz, E. A. and Yu, X.**  
652 (2012). The regulation of N-methyl-D-aspartate receptors by Src kinase. *FEBS J* **279**, 20-8.
- 653 **Grundke-Iqbal, I., Iqbal, K., Tung, Y. C., Quinlan, M., Wisniewski, H. M. and Binder, L. I.**  
654 (1986). Abnormal phosphorylation of the microtubule-associated protein tau (tau) in Alzheimer cytoskeletal  
655 pathology. *Proc Natl Acad Sci U S A* **83**, 4913-7.
- 656 **Gullberg, M., Gustafsdottir, S. M., Schallmeiner, E., Jarvius, J., Bjarnegard, M., Betsholtz,**  
657 **C., Landegren, U. and Fredriksson, S.** (2004). Cytokine detection by antibody-based proximity ligation.  
658 *Proc Natl Acad Sci U S A* **101**, 8420-4.
- 659 **Hall, A. M., Throesch, B. T., Buckingham, S. C., Markwardt, S. J., Peng, Y., Wang, Q.,**  
660 **Hoffman, D. A. and Roberson, E. D.** (2015). Tau-dependent Kv4.2 depletion and dendritic  
661 hyperexcitability in a mouse model of Alzheimer's disease. *J Neurosci* **35**, 6221-30.
- 662 **Harada, A., Oguchi, K., Okabe, S., Kuno, J., Terada, S., Ohshima, T., Sato-Yoshitake, R.,**  
663 **Takei, Y., Noda, T. and Hirokawa, N.** (1994). Altered microtubule organization in small-calibre axons of  
664 mice lacking tau protein. *Nature* **369**, 488-91.
- 665 **Ho, G. J., Hashimoto, M., Adame, A., Izu, M., Alford, M. F., Thal, L. J., Hansen, L. A. and**  
666 **Masliah, E.** (2005). Altered p59Fyn kinase expression accompanies disease progression in Alzheimer's  
667 disease: implications for its functional role. *Neurobiol Aging* **26**, 625-35.
- 668 **Hutton, M., Lendon, C. L., Rizzu, P., Baker, M., Froelich, S., Houlden, H., Pickering-Brown,**  
669 **S., Chakraverty, S., Isaacs, A., Grover, A. et al.** (1998). Association of missense and 5'-splice-site  
670 mutations in tau with the inherited dementia FTDP-17. *Nature* **393**, 702-5.
- 671 **Ikegami, S., Harada, A. and Hirokawa, N.** (2000). Muscle weakness, hyperactivity, and  
672 impairment in fear conditioning in tau-deficient mice. *Neurosci Lett* **279**, 129-32.
- 673 **Ittner, L. M., Ke, Y. D., Delerue, F., Bi, M., Glabach, A., van Eersel, J., Wolfing, H., Chieng,**  
674 **B. C., Christie, M. J., Napier, I. A. et al.** (2010). Dendritic function of tau mediates amyloid-beta toxicity  
675 in Alzheimer's disease mouse models. *Cell* **142**, 387-97.
- 676 **Kalia, L. V., Gingrich, J. R. and Salter, M. W.** (2004). Src in synaptic transmission and  
677 plasticity. *Oncogene* **23**, 8007-16.
- 678 **Ke, Y. D., Suchowerska, A. K., van der Hoven, J., De Silva, D. M., Wu, C. W., van Eersel, J.,**  
679 **Ittner, A. and Ittner, L. M.** (2012). Lessons from tau-deficient mice. *Int J Alzheimers Dis* **2012**, 873270.
- 680 **Kim, Y., Kang, S., Lee, J. Y. and Rhim, H.** (2009). High throughput screening assay of alpha(1G)  
681 T-type Ca<sup>2+</sup> channels and comparison with patch-clamp studies. *Comb Chem High Throughput Screen* **12**,  
682 296-302.
- 683 **Kimura, T., Whitcomb, D. J., Jo, J., Regan, P., Piers, T., Heo, S., Brown, C., Hashikawa, T.,**  
684 **Murayama, M., Seok, H. et al.** (2014). Microtubule-associated protein tau is essential for long-term  
685 depression in the hippocampus. *Philos Trans R Soc Lond B Biol Sci* **369**, 20130144.
- 686 **Kojima, N., Ishibashi, H., Obata, K. and Kandel, E. R.** (1998). Higher seizure susceptibility and  
687 enhanced tyrosine phosphorylation of N-methyl-D-aspartate receptor subunit 2B in fyn transgenic mice.  
688 *Learn Mem* **5**, 429-45.
- 689 **Kojima, N., Wang, J., Mansuy, I. M., Grant, S. G., Mayford, M. and Kandel, E. R.** (1997).  
690 Rescuing impairment of long-term potentiation in fyn-deficient mice by introducing Fyn transgene. *Proc*  
691 *Natl Acad Sci U S A* **94**, 4761-5.
- 692 **Kosik, K. S., Joachim, C. L. and Selkoe, D. J.** (1986). Microtubule-associated protein tau (tau) is  
693 a major antigenic component of paired helical filaments in Alzheimer disease. *Proc Natl Acad Sci U S A* **83**,  
694 4044-8.
- 695 **Lambert, M. P., Barlow, A. K., Chromy, B. A., Edwards, C., Freed, R., Liosatos, M., Morgan,**  
696 **T. E., Rozovsky, I., Trommer, B., Viola, K. L. et al.** (1998). Diffusible, nonfibrillar ligands derived from  
697 Abeta1-42 are potent central nervous system neurotoxins. *Proc Natl Acad Sci U S A* **95**, 6448-53.



- 698 **Lee, G., Newman, S. T., Gard, D. L., Band, H. and Panchamoorthy, G.** (1998). Tau interacts  
699 with src-family non-receptor tyrosine kinases. *J Cell Sci* **111** ( Pt **21**), 3167-77.
- 700 **Lee, G., Thangavel, R., Sharma, V. M., Litersky, J. M., Bhaskar, K., Fang, S. M., Do, L. H.,**  
701 **Andreadis, A., Van Hoesen, G. and Ksiezak-Reding, H.** (2004). Phosphorylation of tau by fyn:  
702 implications for Alzheimer's disease. *J Neurosci* **24**, 2304-12.
- 703 **Lei, P., Ayton, S., Finkelstein, D. I., Spoerri, L., Ciccotosto, G. D., Wright, D. K., Wong, B. X.,**  
704 **Adlard, P. A., Cherny, R. A., Lam, L. Q. et al.** (2012). Tau deficiency induces parkinsonism with  
705 dementia by impairing APP-mediated iron export. *Nat Med* **18**, 291-5.
- 706 **Lei, P., Ayton, S., Moon, S., Zhang, Q., Volitakis, I., Finkelstein, D. I. and Bush, A. I.** (2014).  
707 Motor and cognitive deficits in aged tau knockout mice in two background strains. *Mol Neurodegener* **9**,  
708 29.
- 709 **Leugers, C. J., Koh, J. Y., Hong, W. and Lee, G.** (2013). Tau in MAPK activation. *Front Neurol*  
710 **4**, 161.
- 711 **Leugers, C. J. and Lee, G.** (2010). Tau potentiates nerve growth factor-induced mitogen-activated  
712 protein kinase signaling and neurite initiation without a requirement for microtubule binding. *J Biol Chem*  
713 **285**, 19125-34.
- 714 **Li, Z., Hall, A. M., Kelinske, M. and Roberson, E. D.** (2014). Seizure resistance without  
715 parkinsonism in aged mice after tau reduction. *Neurobiol Aging* **35**, 2617-24.
- 716 **Lopes, S., Lopes, A., Pinto, V., Guimaraes, M. R., Sardinha, V. M., Duarte-Silva, S., Pinheiro,**  
717 **S., Pizarro, J., Oliveira, J. F., Sousa, N. et al.** (2016a). Absence of Tau triggers age-dependent sciatic  
718 nerve morphofunctional deficits and motor impairment. *Aging Cell* **15**, 208-16.
- 719 **Lopes, S., Vaz-Silva, J., Pinto, V., Dalla, C., Kokras, N., Bedenk, B., Mack, N., Czisch, M.,**  
720 **Almeida, O. F., Sousa, N. et al.** (2016b). Tau protein is essential for stress-induced brain pathology. *Proc*  
721 *Natl Acad Sci U S A* **113**, E3755-63.
- 722 **Loscher, W., Honack, D., Fassbender, C. P. and Nolting, B.** (1991). The role of technical,  
723 biological and pharmacological factors in the laboratory evaluation of anticonvulsant drugs. III.  
724 Pentylentetrazole seizure models. *Epilepsy Res* **8**, 171-89.
- 725 **Ma, Q. L., Zuo, X., Yang, F., Ubeda, O. J., Gant, D. J., Alaverdyan, M., Kiose, N. C., Nazari,**  
726 **S., Chen, P. P., Nothias, F. et al.** (2014). Loss of MAP function leads to hippocampal synapse loss and  
727 deficits in the Morris Water Maze with aging. *J Neurosci* **34**, 7124-36.
- 728 **Marie-Cardine, A., Kirchgessner, H., Eckerskorn, C., Meuer, S. C. and Schraven, B.** (1995).  
729 Human T lymphocyte activation induces tyrosine phosphorylation of alpha-tubulin and its association with  
730 the SH2 domain of the p59fyn protein tyrosine kinase. *Eur J Immunol* **25**, 3290-7.
- 731 **Milnerwood, A. J., Gladding, C. M., Pouladi, M. A., Kaufman, A. M., Hines, R. M., Boyd, J.**  
732 **D., Ko, R. W., Vasuta, O. C., Graham, R. K., Hayden, M. R. et al.** (2010). Early increase in  
733 extrasynaptic NMDA receptor signaling and expression contributes to phenotype onset in Huntington's  
734 disease mice. *Neuron* **65**, 178-90.
- 735 **Miyakawa, T., Yagi, T., Tateishi, K. and Niki, H.** (1996). Susceptibility to drug-induced seizures  
736 of Fyn tyrosine kinase-deficient mice. *Neuroreport* **7**, 2723-6.
- 737 **Miyamoto, T., Stein, L., Thomas, R., Djukic, B., Taneja, P., Knox, J., Vossel, K. and Mucke,**  
738 **L.** (2017). Phosphorylation of tau at Y18, but not tau-fyn binding, is required for tau to modulate NMDA  
739 receptor-dependent excitotoxicity in primary neuronal culture. *Mol Neurodegener* **12**, 41.
- 740 **Morris, M., Hamto, P., Adame, A., Devidze, N., Masliah, E. and Mucke, L.** (2013). Age-  
741 appropriate cognition and subtle dopamine-independent motor deficits in aged tau knockout mice.  
742 *Neurobiol Aging* **34**, 1523-9.
- 743 **Nakazawa, T., Komai, S., Tezuka, T., Hisatsune, C., Umemori, H., Semba, K., Mishina, M.,**  
744 **Manabe, T. and Yamamoto, T.** (2001). Characterization of Fyn-mediated tyrosine phosphorylation sites  
745 on GluR epsilon 2 (NR2B) subunit of the N-methyl-D-aspartate receptor. *J Biol Chem* **276**, 693-9.
- 746 **Nukina, N. and Ihara, Y.** (1986). One of the antigenic determinants of paired helical filaments is  
747 related to tau protein. *J Biochem* **99**, 1541-4.

- 748 **Oyama, F., Kotliarova, S., Harada, A., Ito, M., Miyazaki, H., Ueyama, Y., Hirokawa, N.,**  
749 **Nukina, N. and Ihara, Y.** (2004). Gem GTPase and tau: morphological changes induced by gem GTPase  
750 in cho cells are antagonized by tau. *J Biol Chem* **279**, 27272-7.
- 751 **Poorkaj, P., Bird, T. D., Wijsman, E., Nemens, E., Garruto, R. M., Anderson, L., Andreadis,**  
752 **A., Wiederholt, W. C., Raskind, M. and Schellenberg, G. D.** (1998). Tau is a candidate gene for  
753 chromosome 17 frontotemporal dementia. *Ann Neurol* **43**, 815-25.
- 754 **Racine, R. J.** (1972). Modification of seizure activity by electrical stimulation. II. Motor seizure.  
755 *Electroencephalogr Clin Neurophysiol* **32**, 281-94.
- 756 **Regan, P., Piers, T., Yi, J. H., Kim, D. H., Huh, S., Park, S. J., Ryu, J. H., Whitcomb, D. J.**  
757 **and Cho, K.** (2015). Tau phosphorylation at serine 396 residue is required for hippocampal LTD. *J*  
758 *Neurosci* **35**, 4804-12.
- 759 **Roberson, E. D., Halabisky, B., Yoo, J. W., Yao, J., Chin, J., Yan, F., Wu, T., Hamto, P.,**  
760 **Devidze, N., Yu, G. Q. et al.** (2011). Amyloid-beta/Fyn-induced synaptic, network, and cognitive  
761 impairments depend on tau levels in multiple mouse models of Alzheimer's disease. *J Neurosci* **31**, 700-11.
- 762 **Roberson, E. D., Scarce-Levie, K., Palop, J. J., Yan, F., Cheng, I. H., Wu, T., Gerstein, H.,**  
763 **Yu, G. Q. and Mucke, L.** (2007). Reducing endogenous tau ameliorates amyloid beta-induced deficits in  
764 an Alzheimer's disease mouse model. *Science* **316**, 750-4.
- 765 **Rong, Y., Lu, X., Bernard, A., Khrestchatsky, M. and Baudry, M.** (2001). Tyrosine  
766 phosphorylation of ionotropic glutamate receptors by Fyn or Src differentially modulates their susceptibility  
767 to calpain and enhances their binding to spectrin and PSD-95. *J Neurochem* **79**, 382-90.
- 768 **Sapir, T., Frotscher, M., Levy, T., Mandelkow, E. M. and Reiner, O.** (2012). Tau's role in the  
769 developing brain: implications for intellectual disability. *Hum Mol Genet* **21**, 1681-92.
- 770 **Sharma, V. M., Littersky, J. M., Bhaskar, K. and Lee, G.** (2007). Tau impacts on growth-factor-  
771 stimulated actin remodeling. *J Cell Sci* **120**, 748-57.
- 772 **Shirazi, S. K. and Wood, J. G.** (1993). The protein tyrosine kinase, fyn, in Alzheimer's disease  
773 pathology. *Neuroreport* **4**, 435-7.
- 774 **Shuttleworth, T. J. and Thompson, J. L.** (1991). Effect of temperature on receptor-activated  
775 changes in  $[Ca^{2+}]_i$  and their determination using fluorescent probes. *J Biol Chem* **266**, 1410-4.
- 776 **Soderberg, O., Gullberg, M., Jarvius, M., Ridderstrale, K., Leuchowius, K. J., Jarvius, J.,**  
777 **Wester, K., Hydbring, P., Bahram, F., Larsson, L. G. et al.** (2006). Direct observation of individual  
778 endogenous protein complexes in situ by proximity ligation. *Nat Methods* **3**, 995-1000.
- 779 **Sowers, L. P., Loo, L., Wu, Y., Campbell, E., Ulrich, J. D., Wu, S., Paemka, L., Wassink, T.,**  
780 **Meyer, K., Bing, X. et al.** (2013). Disruption of the non-canonical Wnt gene PRICKLE2 leads to autism-  
781 like behaviors with evidence for hippocampal synaptic dysfunction. *Mol Psychiatry* **18**, 1077-89.
- 782 **Spillantini, M. G., Murrell, J. R., Goedert, M., Farlow, M. R., Klug, A. and Ghetti, B.** (1998).  
783 Mutation in the tau gene in familial multiple system tauopathy with presenile dementia. *Proc Natl Acad Sci*  
784 *USA* **95**, 7737-41.
- 785 **Stein, P. L., Lee, H. M., Rich, S. and Soriano, P.** (1992). pp59fyn mutant mice display  
786 differential signaling in thymocytes and peripheral T cells. *Cell* **70**, 741-50.
- 787 **Tan, D. C. S., Yao, S., Ittner, A., Bertz, J., Ke, Y. D., Ittner, L. M. and Delerue, F.** (2018).  
788 Generation of a New Tau Knockout (tauDeltaex1) Line Using CRISPR/Cas9 Genome Editing in Mice. *J*  
789 *Alzheimers Dis* **62**, 571-578.
- 790 **Tang, Y. P., Wang, H., Feng, R., Kyin, M. and Tsien, J. Z.** (2001). Differential effects of  
791 enrichment on learning and memory function in NR2B transgenic mice. *Neuropharmacology* **41**, 779-90.
- 792 **Tezuka, T., Umemori, H., Akiyama, T., Nakanishi, S. and Yamamoto, T.** (1999). PSD-95  
793 promotes Fyn-mediated tyrosine phosphorylation of the N-methyl-D-aspartate receptor subunit NR2A.  
794 *Proc Natl Acad Sci USA* **96**, 435-40.
- 795 **Trepanier, C. H., Jackson, M. F. and MacDonald, J. F.** (2012). Regulation of NMDA receptors  
796 by the tyrosine kinase Fyn. *FEBS J* **279**, 12-9.

797 **Trinczek, B., Ebner, A., Mandelkow, E. M. and Mandelkow, E.** (1999). Tau regulates the  
798 attachment/detachment but not the speed of motors in microtubule-dependent transport of single vesicles  
799 and organelles. *J Cell Sci* **112 ( Pt 14)**, 2355-67.

800 **Tucker, K. L., Meyer, M. and Barde, Y. A.** (2001). Neurotrophins are required for nerve growth  
801 during development. *Nat Neurosci* **4**, 29-37.

802 **Umemori, H., Wanaka, A., Kato, H., Takeuchi, M., Tohyama, M. and Yamamoto, T.** (1992).  
803 Specific expressions of Fyn and Lyn, lymphocyte antigen receptor-associated tyrosine kinases, in the  
804 central nervous system. *Brain Res Mol Brain Res* **16**, 303-10.

805 **van Hummel, A., Bi, M., Ippati, S., van der Hoven, J., Volkerling, A., Lee, W. S., Tan, D. C.,**  
806 **Bongers, A., Ittner, A., Ke, Y. D. et al.** (2016). No Overt Deficits in Aged Tau-Deficient  
807 C57Bl/6.Mapt<sup>tm1(EGFP)Kit GFP</sup> Knockin Mice. *PLoS One* **11**, e0163236.

808 **Vanderweyde, T., Apicco, D. J., Youmans-Kidder, K., Ash, P. E. A., Cook, C., Lummertz da**  
809 **Rocha, E., Jansen-West, K., Frame, A. A., Citro, A., Leszyk, J. D. et al.** (2016). Interaction of tau with  
810 the RNA-Binding Protein TIA1 Regulates tau Pathophysiology and Toxicity. *Cell Rep* **15**, 1455-1466.

811 **Weingarten, M. D., Lockwood, A. H., Hwo, S. Y. and Kirschner, M. W.** (1975). A protein  
812 factor essential for microtubule assembly. *Proc Natl Acad Sci U S A* **72**, 1858-62.

813 **White, R., Gonsior, C., Kramer-Albers, E. M., Stohr, N., Huttelmaier, S. and Trotter, J.**  
814 (2008). Activation of oligodendroglial Fyn kinase enhances translation of mRNAs transported in hnRNP  
815 A2-dependent RNA granules. *J Cell Biol* **181**, 579-86.

816 **Wood, J. G., Mirra, S. S., Pollock, N. J. and Binder, L. I.** (1986). Neurofibrillary tangles of  
817 Alzheimer disease share antigenic determinants with the axonal microtubule-associated protein tau (tau).  
818 *Proc Natl Acad Sci U S A* **83**, 4040-3.

819 **Zamora-Leon, S. P., Lee, G., Davies, P. and Shafit-Zagardo, B.** (2001). Binding of Fyn to MAP-  
820 2c through an SH3 binding domain. Regulation of the interaction by ERK2. *J Biol Chem* **276**, 39950-8.

821

822

## Figure Legends

822

823

824 **Fig. 1: Confirmed by MRI, tau<sup>-/-</sup>/Fyn<sup>-/-</sup> double knockout (DKO) mice with hydrocephalus exhibited**  
825 **behavioral abnormalities.**

826 A) Polymerase chain reaction (PCR) products from heterozygous (Het), WT, and DKO mice are  
827 shown.

828 B) Western blot of crude brain lysate showed that DKO mice did not express tau or Fyn.

829 C) Examples of T2 weighted MRI of coronal mouse brains showing normal, moderate, or severe  
830 hydrocephalus.

831 D) In the open field test, Fyn KO and DKO mice with hydrocephalus (moderate or severe) had  
832 increased total movements relative to mice with no hydrocephalus. n=18 Fyn KO, 13 DKO, 41 Fyn KO  
833 hydro, 19 DKO hydro. \*\*\*\*p≤ 0.0001.

834 E) In contextual fear conditioning, Fyn KO and DKO mice with moderate or severe hydrocephalus  
835 had decreased freezing relative to mice with no hydrocephalus. n=21 Fyn KO, 20 DKO, 33 Fyn KO hydro,  
836 23 DKO hydro. \*\*p=0.0014, \*\*\*\*p≤ 0.0001.

837 Mean ± S.E.M. are shown. Ordinary one-way ANOVA with Tukey's post-hoc multiple comparison was  
838 used for both panels D and E.

839

840 **Fig. 2: In memory tasks, DKO recapitulated the behavior of Fyn KO mice whereas in PTZ induced**  
841 **seizures, DKO mimicked the tau KO mice.**

842 A) In novel object recognition, there was no difference in object preference on training day (One-way  
843 ANOVA p= 0.3221; left panel) while on testing day, Fyn KO and DKO mice had significantly reduced  
844 interaction with the novel object (right panel; One-way ANOVA: p<0.0001; \*\*\*p=0.0004, \*\*\*\*p≤  
845 0.0001). n= 17 WT, 17 tau KO, 28 Fyn KO, 18 DKO.

846 B) In contextual fear conditioning, using minute by minute measurements, WT and tau KO mice spent  
847 more time freezing compared to Fyn KO and DKO mice on both training day (left) and testing day (right).  
848 n= 32 WT, 29 tau KO, 21 Fyn KO, 20 DKO.

849 C) Fyn KO and DKO mice spent less time freezing than WT (p=0.0002, p<0.0001, respectively) and  
850 tau KO mice (p=0.0075, p=0.0004, respectively). One-way ANOVA: p<0.0001; \*\*p= 0.0075, \*\*\*p=  
851 0.0002 or 0.0004, \*\*\*\*p≤ 0.0001.

852 D) Ratio of time freezing in first minute of day 2 to time freezing in last minute of day 1 show an  
853 average of 1 for all genotypes, indicating a learning rather than memory deficit for Fyn KO and DKO mice.  
854 One-way ANOVA: p=0.0509

855 E) In PTZ induced seizures, tau KO and DKO mice were equally protected while Fyn KO mice were  
856 only moderately protected as measured in latency to reach each seizure stage. n= 25 WT, 21 tau KO, 36 Fyn  
857 KO, and 26 DKO.

858 F) For maximum seizure stage reached, tau KO and DKO mice were similarly protected relative to  
859 WT and Fyn KO mice; Fyn KO mice were only slightly protected relative to WT mice. One-way ANOVA:  
860  $p < 0.0001$ ;  $**p = 0.0011$ ,  $***p = 0.0003$ ,  $****p \leq 0.0001$ . n= 25 WT, 21 tau KO, 36 Fyn KO, and 26 DKO.  
861 Mean  $\pm$  S.E.M. are shown. Ordinary one-way ANOVA with Tukey's post-hoc multiple comparisons were  
862 used for A, B, C, D, F. Ordinary two-way ANOVA with Tukey's post-hoc multiple comparisons were used  
863 for B and E.

864

865 **Fig. 3: Tau-Fyn, tau-pSFK, and tau-Src complexes are present in neurons.**

866 A,F,K) Using WT hippocampal neurons, tau-Fyn (A), tau-pSFK (F), and tau-Src (K) complexes were  
867 identified using proximity ligation assay as described in Materials and Methods. Scale bar: 25 $\mu$ m.

868 B-D, G-I, L-N) Tau-Fyn, tau-pSFK, and tau-Src complexes were found in axons (B, G, L), dendrites (C, H,  
869 M), and cell bodies (D, I, N), respectively. Scale bar: 10 $\mu$ m (B, C, G, H, L, M); 20  $\mu$ m (D, I, N).

870 E, J, O) PLA complex density in WT neurons was quantitated as described in Materials and Methods.

871 Mean  $\pm$  S.E.M. are shown. n=30 areas from each condition were analyzed.  $****p \leq 0.0001$  as determined by  
872 unpaired parametric 2 tailed t-test.

873

874 **Fig. 4: Fyn KO and DKO hippocampal PSD fraction had decreased phospho-Y1472 NR2B and**  
875 **phospho-SFK levels**

876 A) Schematic for separating insoluble PSD and soluble non-PSD fractions from crude synaptosomes.

877 B) Soluble non-PSD fraction isolated from crude hippocampal synaptosomes of WT mice showed  
878 synaptophysin, a pre-synaptic marker, while insoluble PSD fraction showed PSD95, a post-synaptic marker.  
879 Fyn and tau were found in both fractions.

880 C) Western blotting of hippocampal insoluble PSD fractions prepared from WT, tau KO, Fyn KO, and  
881 DKO.

882 D) Blots were quantitated by densitometry and normalized. n=9 animals for each genotype. For  
883 pY1472-NR2B, relative to WT, levels were decreased in Fyn KO and in DKO ( $***p = 0.0008$ ,  
884  $****p < 0.0001$ , respectively); relative to tau KO, levels were also significantly decreased in Fyn KO and in  
885 DKO ( $****p < 0.0001$ ,  $****p < 0.0001$ , respectively). For pSFK, relative to WT, levels were decreased in Fyn  
886 KO and in DKO ( $****p < 0.0001$ ,  $****p < 0.0001$ , respectively); relative to tau KO, levels were also  
887 decreased in Fyn KO and in DKO ( $****p < 0.0004$ ,  $****p < 0.0004$ , respectively).



888 Mean  $\pm$  S.E.M. are shown. Unpaired two-tailed parametric t-test was used for Fyn and ordinary one-way  
889 ANOVA with Tukey's post-hoc multiple comparisons was used for others.

890

891 **Fig. 5: Glutamate induced  $\text{Ca}^{2+}$  response was impaired in Fyn KO and DKO hippocampal neurons**

892 A)  $\text{Ca}^{2+}$  response traces from five representative neurons from each genotype are shown; traces were  
893 obtained in response to glutamate and glycine as described in Materials and Methods.

894 B) No difference in baseline intracellular  $[\text{Ca}^{2+}]_i$  was found among the hippocampal neurons from the  
895 different genotypes. n= 105 WT, 115 tau KO, 114 Fyn KO, and 181 DKO cells were analyzed. p=0.2808.

896 C) Upon stimulation, Fyn KO neurons had a 29.9% reduction (\*\*\*\*p<0.0001) and DKO neurons had a  
897 53.1% reduction (\*\*\*\*p<0.0001) in  $\text{Ca}^{2+}$  response relative to WT neurons. The reduction of the DKO  
898 neurons was significantly different from that of Fyn KO neurons (\*\*\*p=0.0001).

899 Mean  $\pm$  S.E.M. are shown. Ordinary one-way ANOVA with Tukey's post-hoc multiple comparisons was  
900 used.

901

902 **Fig. 6: Microtubule-associated protein 2 (MAP2) is increased in tau KO and its association with Fyn  
903 increases Fyn activity**

904 A) Crude mouse brain lysates from four genotypes were probed for MAP2, with GAPDH as control.  
905 Relative to WT mice, MAP2 was increased in tau KO mice (\* p=0.021), decreased in Fyn KO mice  
906 (\*p=0.044) as well as in DKO mice (\*\*p=0.0045). Mean  $\pm$  S.E.M. are shown 7 WT, 8 tau KO, 8 Fyn KO,  
907 and 8 DKO mice were used.

908 B) Lysates from 3T3 cells confirmed transfection with Fyn alone or Fyn plus MAP2c.

909 C) Fyn IP from cells co-transfected with Fyn plus MAP2c showed increased pSFK levels relative to  
910 Fyn IP from cells transfected with Fyn alone. No Src was detected (C). n=4 independent experiments were  
911 conducted. \*p=0.0254.

912 D) Tubulin was incubated either alone, with Fyn, or with Fyn plus N-MAP2c, then probed with anti-  
913 phospho-tyrosine (4G10). n=6 independent experiments.

914 Unpaired two-tailed parametric t-test was used for A, C, D. Mean  $\pm$  S.E.M. are shown.

915

916 **Fig. 7: Tau KO neurons have more MAP2-Fyn, MAP2-pSFK, and MAP2-Src complexes relative to  
917 WT neurons.**

918 MAP2-Fyn (A, B), MAP2-pSFK (C, D), and MAP2-Src complexes (E, F) were detected in WT neurons  
919 (A,C,E) or tau KO neurons (B, D, F) using proximity ligation assay. No MAP2-SFK complexes were  
920 visualized in axons (open arrow heads). Scale bar: 25 $\mu\text{m}$ . MAP2-Fyn (G), MAP2-pSFK (H), and MAP2-  
921 Src (I) complex densities were quantitated in both WT and tau KO neurons. Mean  $\pm$  S.E.M. are shown, 88



922 images for MAP2-Fyn, 30 images for MAP2-pSFK, and 30 images for MAP2-Src were analyzed. Unpaired  
923 parametric two-tailed t-test was used. For G) and I), \*\*\*\* $p \leq 0.0001$  and for H), \*\* $p = 0.0033$ .

924

925

926

927

**Figure 1**

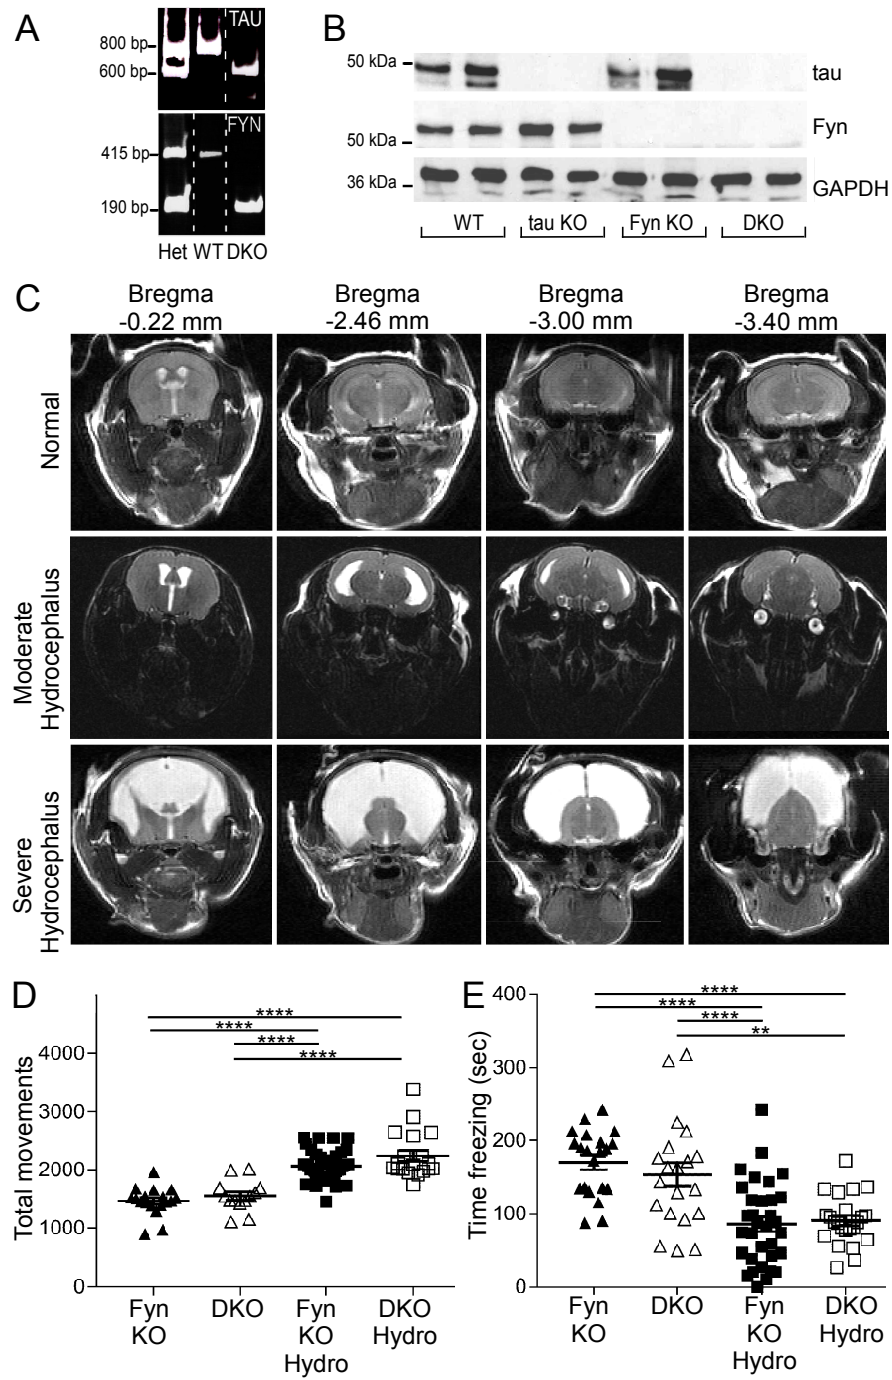

**Figure 2**

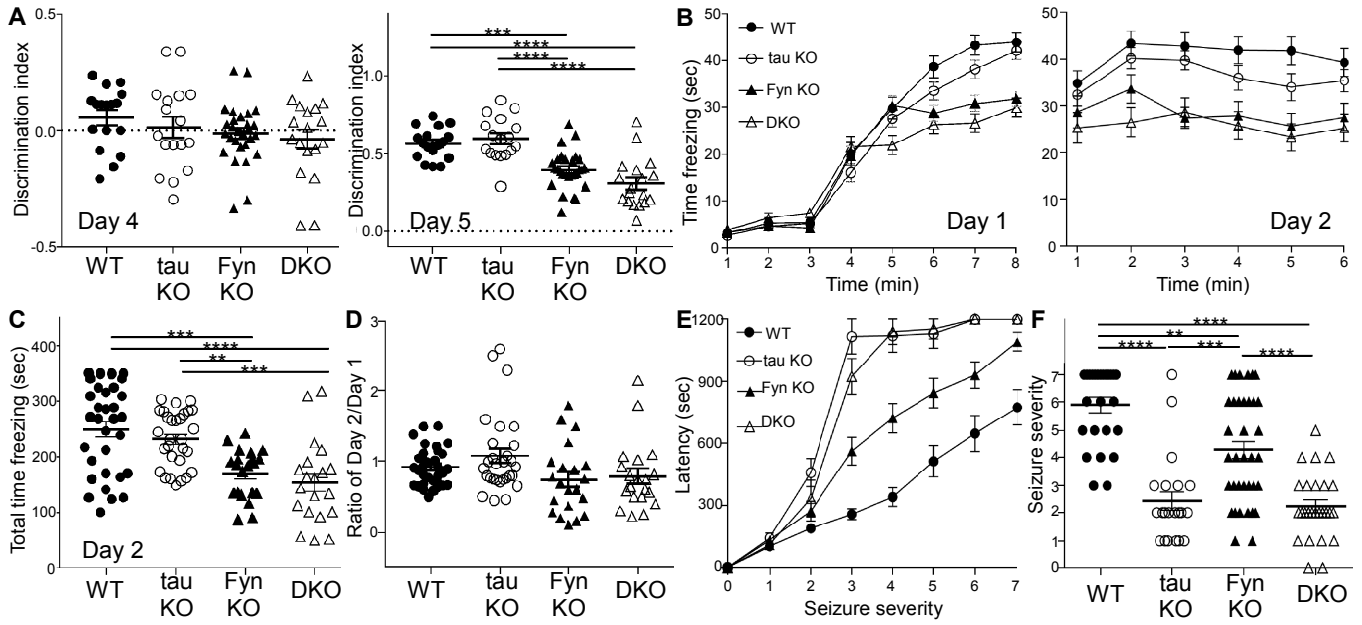

**Figure 3**

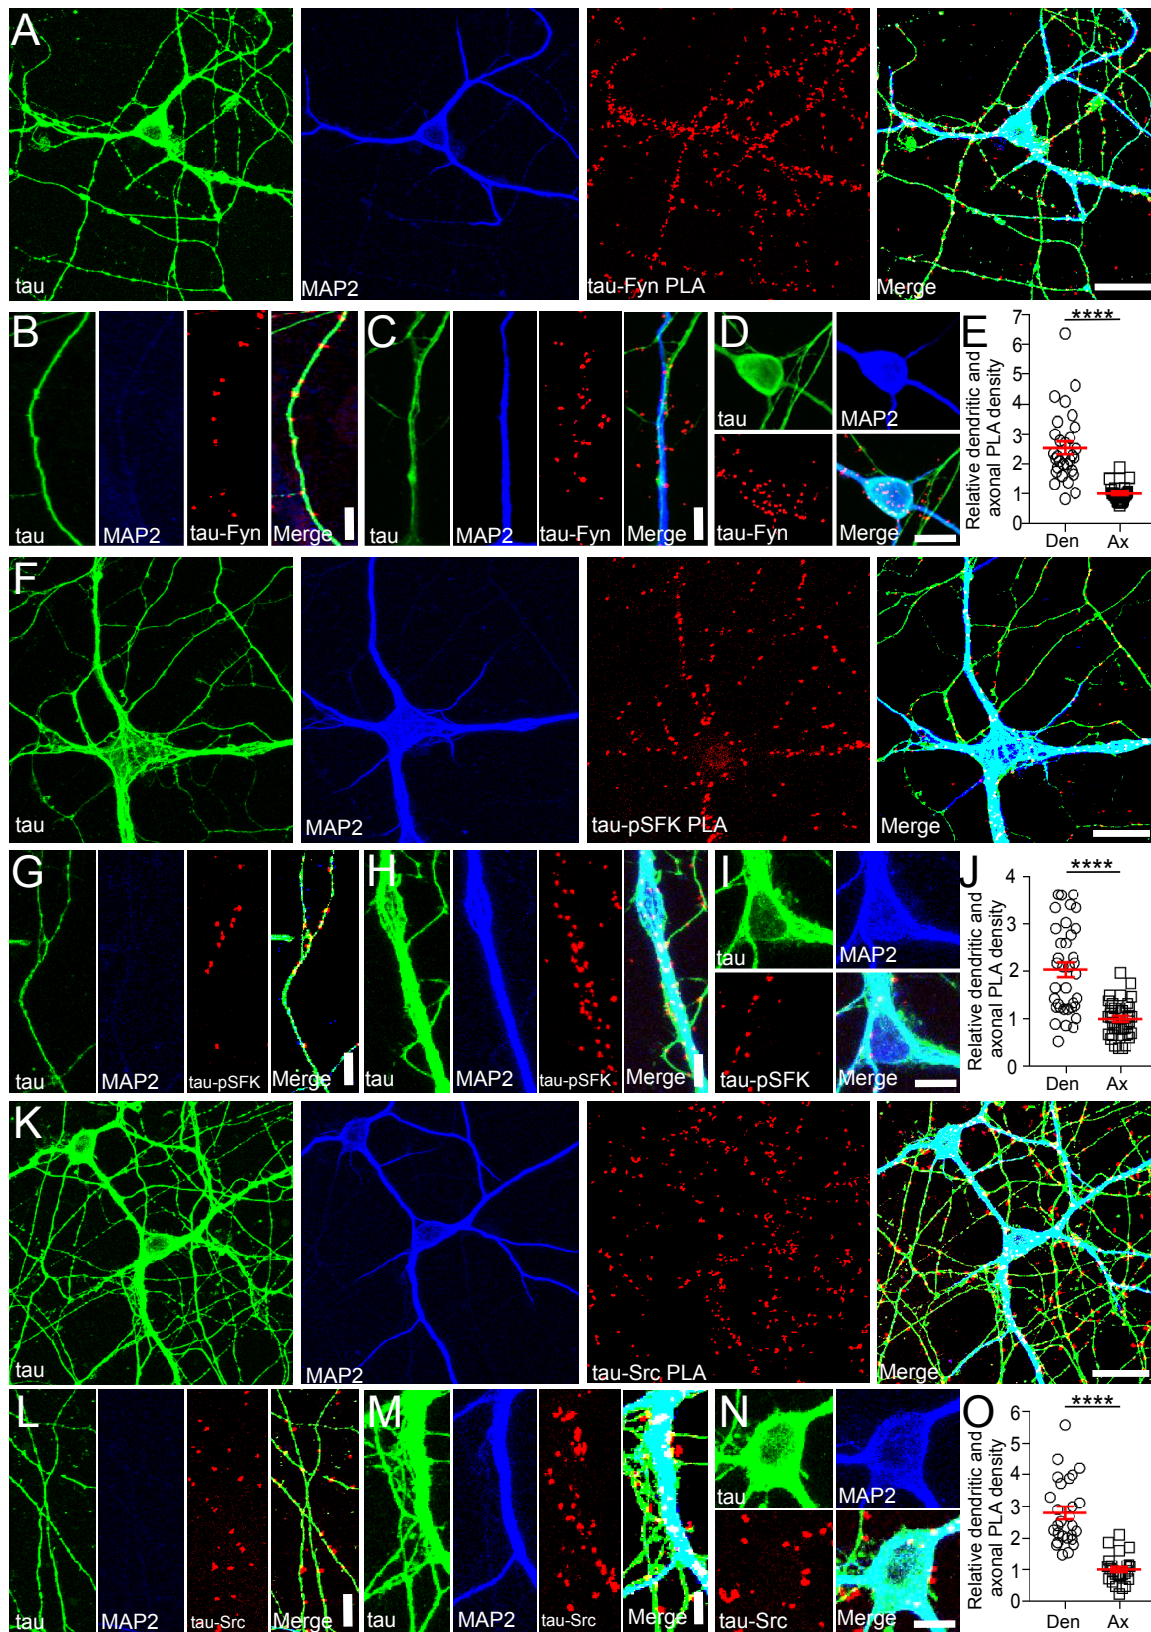

## Figure 4

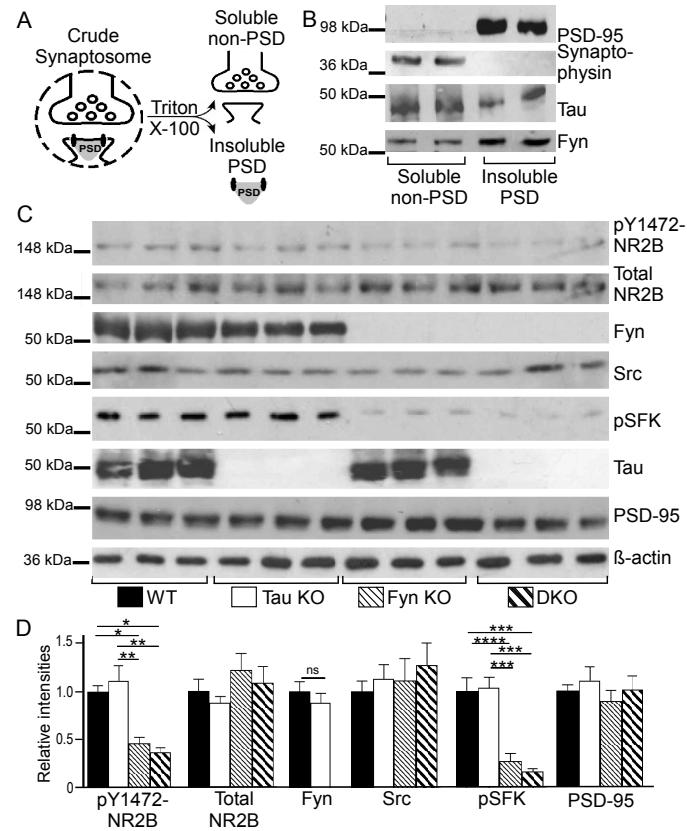

**Figure 5**

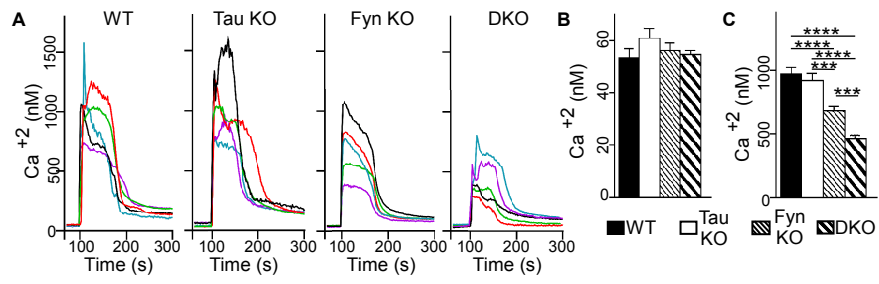



## Figure 6

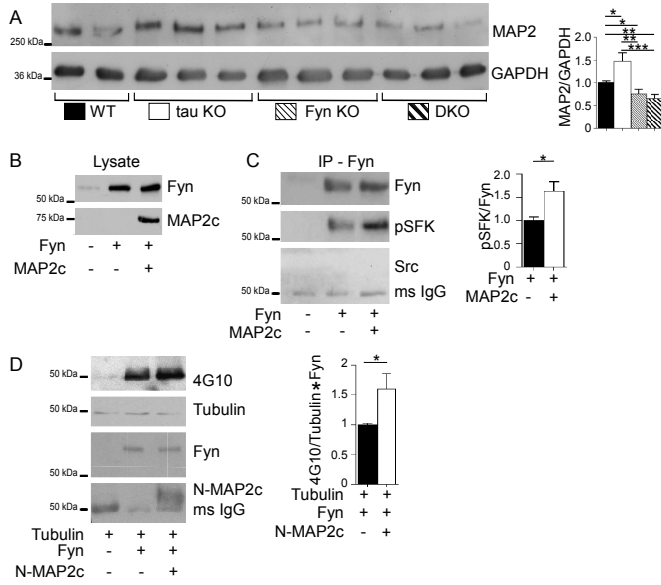

**Figure 7**

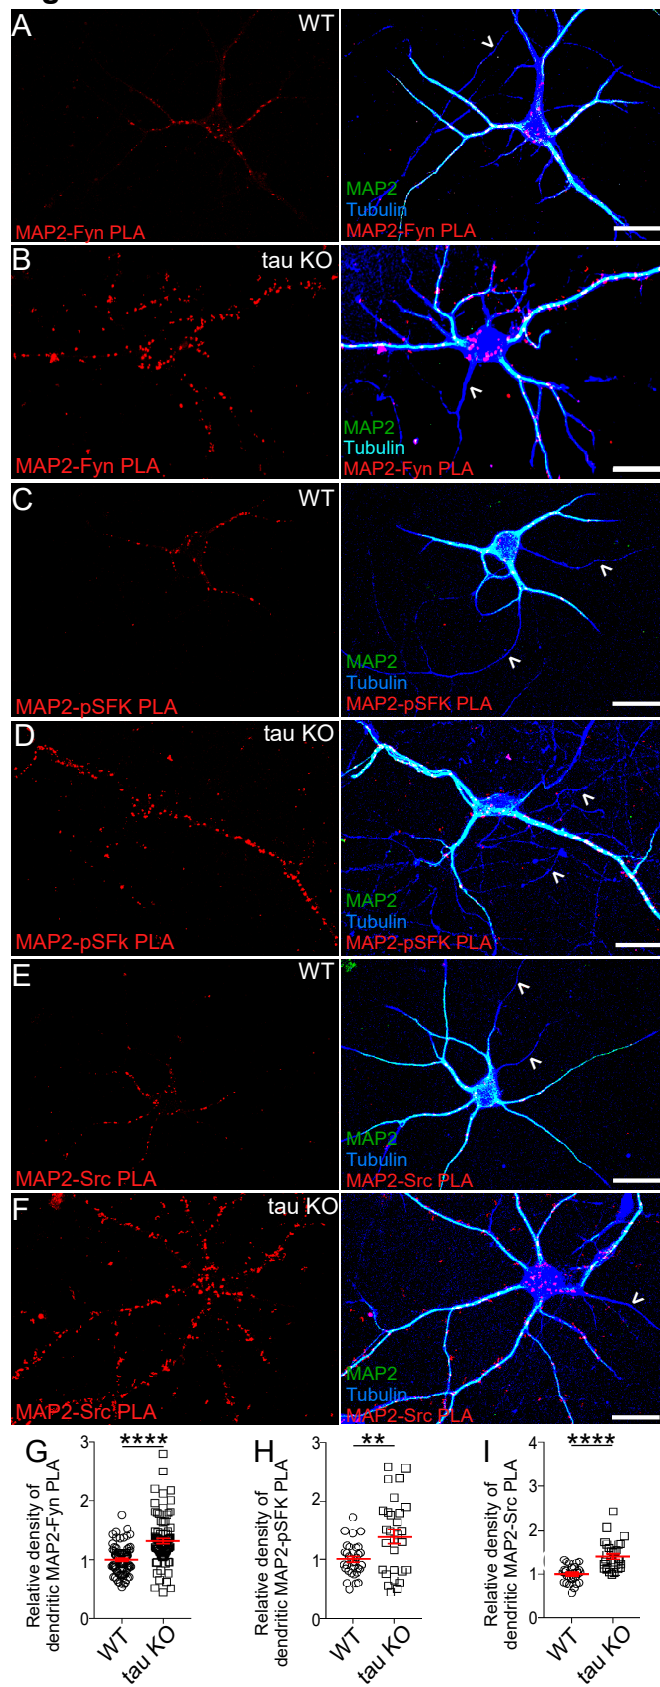

Source: http://biorxiv.org/content/10.1101/567776v1.full.pdf
